# Supplementary material for: iBBiG: iterative binary bi-clustering of gene sets
Source: PubMed Central journal article supplement (PMC3463116; doi:10.1093/bioinformatics/bts438), 2012-07-12
Supplement: supp_bts438_iBBiG_supplement.pdf [file supp_bts438_iBBiG_supplement.pdf]

## 1 SUPPLEMENT

# iBBiG: Iterative Binary Bi-clustering of Gene Sets

Daniel Gusenleitner, Eleanor A Howe, Stefan Bentink, John Quackenbush and Aedín C Culhane

### Contact Information:

Aedin Culhane: aedin@jimmy.harvard.edu

Daniel Gusenleitner: gusef@bu.edu

## 2 OPTIMIZATION AND EVALUATION:

Details of the 21 breast cancer datasets analyzed using GSEAlm and iBBiG bi-cluster discovery

**Table 1.** 21 Breast cancer datasets that are included in the study

| Identifier        | Array Type                         | #CELS | Pubmed   | First Author  | Journal                 | PubDate | Title                                                                                                                                       |
|-------------------|------------------------------------|-------|----------|---------------|-------------------------|---------|---------------------------------------------------------------------------------------------------------------------------------------------|
| breast_boersma    | HG-U133A                           | 95    | 17999412 | BJ Boersma    | Int J Cancer            | Mar 08  | A stromal gene signature associated with inflammatory breast cancer.                                                                        |
| breast_chang      | HG-U95Av2                          | 24    | 12907009 | JC Chang      | Lancet                  | Aug 03  | Gene expression profiling for the prediction of therapeutic response to docetaxel in patients with breast cancer.                           |
| breast_chen       | HG-U133 Plus 2                     | 185   | 19266279 | DT Chen       | Breast Cancer Res Treat | Mar 09  | Proliferative genes dominate malignancy-risk gene signature in histologically-normal breast tissue.                                         |
| breast_chin       | U133AAofAv2                        | 130   | 17157792 | K Chin        | Cancer Cell             | Dec 06  | Genomic and transcriptional aberrations linked to breast cancer pathophysiology.                                                            |
| breast_farmer     | HG-U133A                           | 49    | 15897907 | P Farmer      | Oncogene                | Jul 05  | Identification of molecular apocrine breast tumours by microarray analysis.                                                                 |
| breast_fournier   | HG-U133A                           | 12    | 16849555 | MV Fournier   | Cancer Res              | Jul 06  | Gene expression signature in organized and growth-arrested mammary acini predicts good outcome in breast cancer.                            |
| breast_huang      | HG-U95Av2                          | 89    | 12747878 | E Huang       | Lancet                  | May 03  | Gene expression predictors of breast cancer outcomes.                                                                                       |
| breast_ivshina    | HG-U133A, HG-U133B                 | 578   | 17079448 | AV Ivshina    | Cancer Res              | Nov 06  | Genetic reclassification of histologic grade delineates new clinical subtypes of breast cancer.                                             |
| breast_loi        | HG-U133A, HG-U133B, HG-U133 Plus 2 | 741   | 17401012 | S Loi         | J Clin Oncol            | Apr 07  | Definition of clinically distinct molecular subtypes in estrogen receptor-positive breast carcinomas through genomic grade.                 |
| breast_loi1       | HG-U133 Plus 2                     | 77    | 18498629 | S Loi         | BMC Genomics            | 2008    | Predicting prognosis using molecular profiling in estrogen receptor-positive breast cancer treated with tamoxifen.                          |
| breast_lu         | HG-U133 Plus 2                     | 127   | 18297396 | X Lu          | Breast Cancer Res Treat | Mar 08  | Predicting features of breast cancer with gene expression patterns.                                                                         |
| breast_miller     | HG-U133A, HG-U133B                 | 502   | 16141321 | LD Miller     | Proc Natl Acad Sci      | Sep 05  | An expression signature for p53 status in human breast cancer predicts mutation status, transcriptional effects, and patient survival.      |
| breast_minn       | HG-U133A                           | 121   | 16049480 | AJ Minn       | Nature                  | Jul 05  | Genes that mediate breast cancer metastasis to lung.                                                                                        |
| breast_pawitan    | HG-U133A, HG-U133B                 | 318   | 16280042 | Y Pawitan     | Breast Cancer Res       | 2005    | Gene expression profiling spares early breast cancer patients from adjuvant therapy: derived and validated in two population-based cohorts. |
| breast_richardson | HG-U133 Plus 2                     | 47    | 16473279 | AL Richardson | Cancer Cell             | Feb 06  | X chromosomal abnormalities in basal-like human breast cancer.                                                                              |
| breast_schmidt    | HG-U133A                           | 200   | 18593943 | M Schmidt     | Cancer Res              | Jul 08  | The humoral immune system has a key prognostic impact in node-negative breast cancer.                                                       |
| breast_seitz      | HG-U133A                           | 26    | 17410534 | A Klein       | Int J Cancer            | Aug 07  | Comparison of gene expression data from human and mouse breast cancers: identification of a conserved breast tumor gene set.                |
| breast_sotiriou   | HG-U133A                           | 189   | 16478745 | C Sotiriou    | J Natl Cancer Inst      | Feb 06  | Gene expression profiling in breast cancer: understanding the molecular basis of histologic grade to improve prognosis.                     |
| breast_turashvili | HG-U133 Plus 2                     | 30    | 17389037 | G Turashvili  | BMC Cancer              | 2007    | Novel markers for differentiation of lobular and ductal invasive breast carcinomas by laser microdissection and microarray analysis.        |
| breast_wang       | HG-U133A                           | 286   | 15721472 | Y Wang        | Lancet                  |         | Gene-expression profiles to predict distant metastasis of lymph-node-negative primary breast cancer.                                        |
| breast_west       | Hu6800                             | 49    | 11562467 | M West        | Proc Natl Acad Sci      | Sep 01  | Predicting the clinical status of human breast cancer by using gene expression profiles.                                                    |

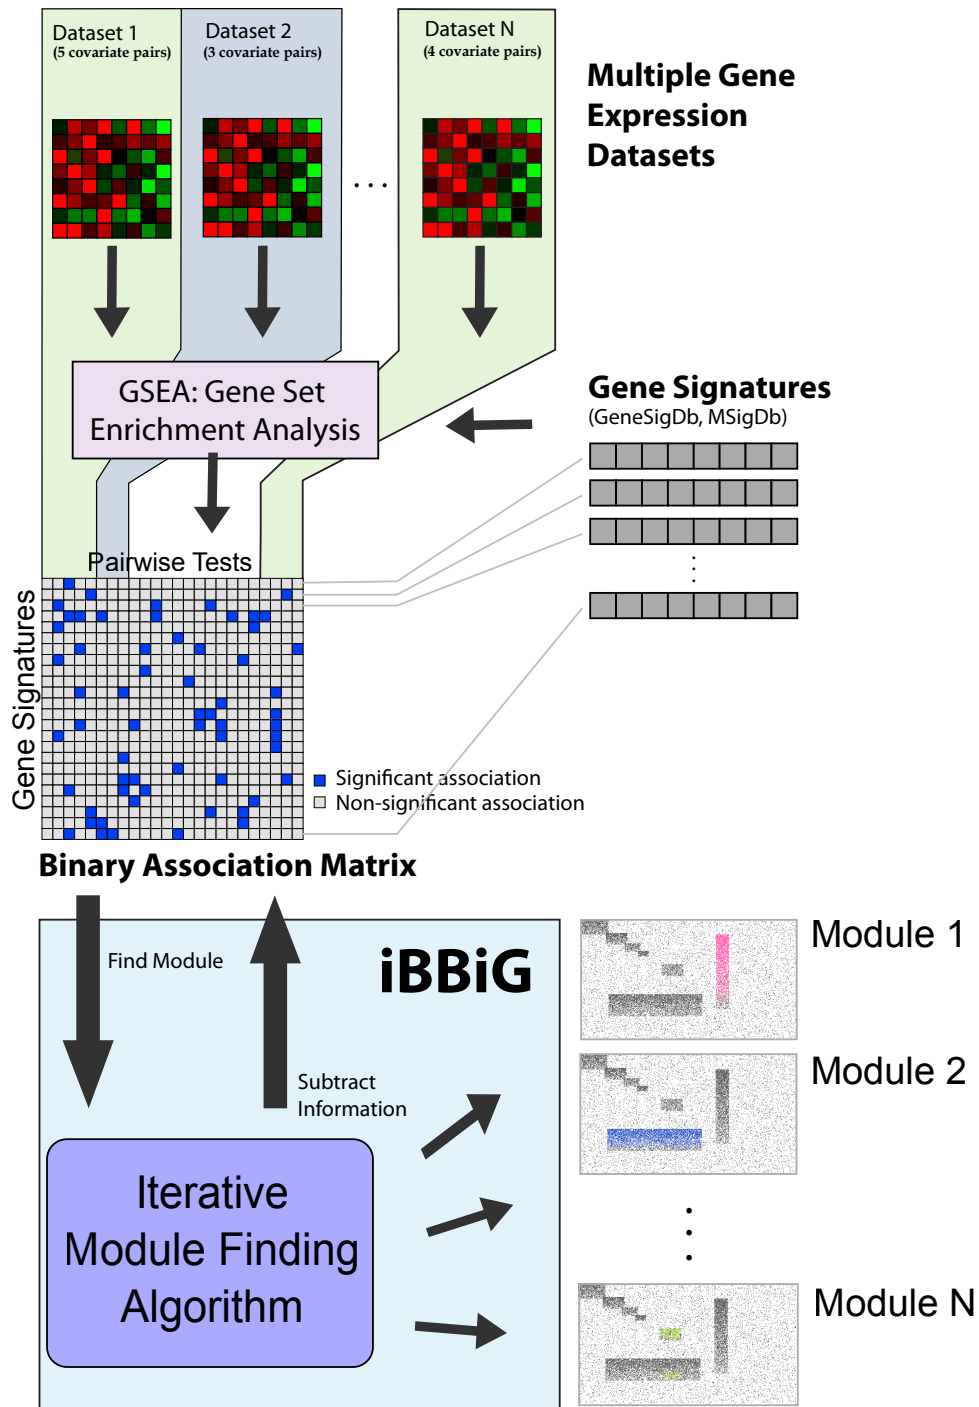

**Supplementary Fig. 1.** Flowchart of iBBiG meta-Geneset analysis. Results of single sample or pairwise test gene set enrichment analysis (GSA) are discretized and subject to iBBiG cluster discovery which iteratively find and masks clusters in the binary data matrix

---

### 3 OPTIMIZATION AND EVALUATION:

Different values of each parameter were tested to determine an optimal value. Values of  $\alpha$ -parameter from [0.1, 0.9] in 0.1 increments were tested, each using 100 randomly generated artificial datasets. Similar tests were performed for the selection pressure [1.1, 1.9] in 0.1 increments, population sizes of 50, 100, 150, 250, and 300, success ratios [0.1, 0.9] in 0.1 increments and mutation rates [0.02, 0.20] in 0.02 increments.

The behavior of the GA iBBiG was also tested with differing levels of background noise, where the noise was increased in 5% increments, up to 50%. To evaluate the performance of each of the algorithms tested, including the various parameter values considered, the extracted modules were compared to the actual clusters in the artificial dataset. The results were used to build a contingency table and to calculate the sensitivity and specificity.

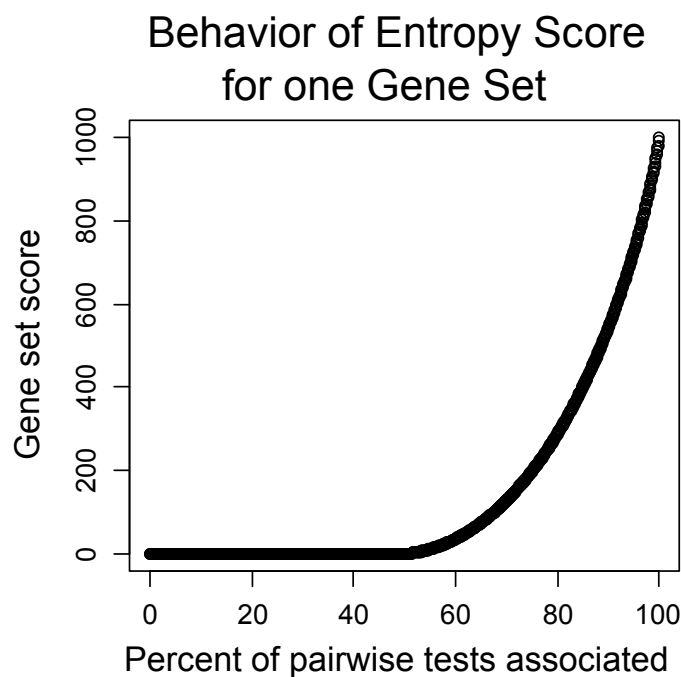

**Supplementary Fig. 2.** Behavior of the entropy based score for one single gene set and 1000 clinical phenotypes. The left side represents a situation in which the gene set is not associated with any of the phenotypes within the chosen grouping, whereas the right side indicates a strong association with all phenotypes.

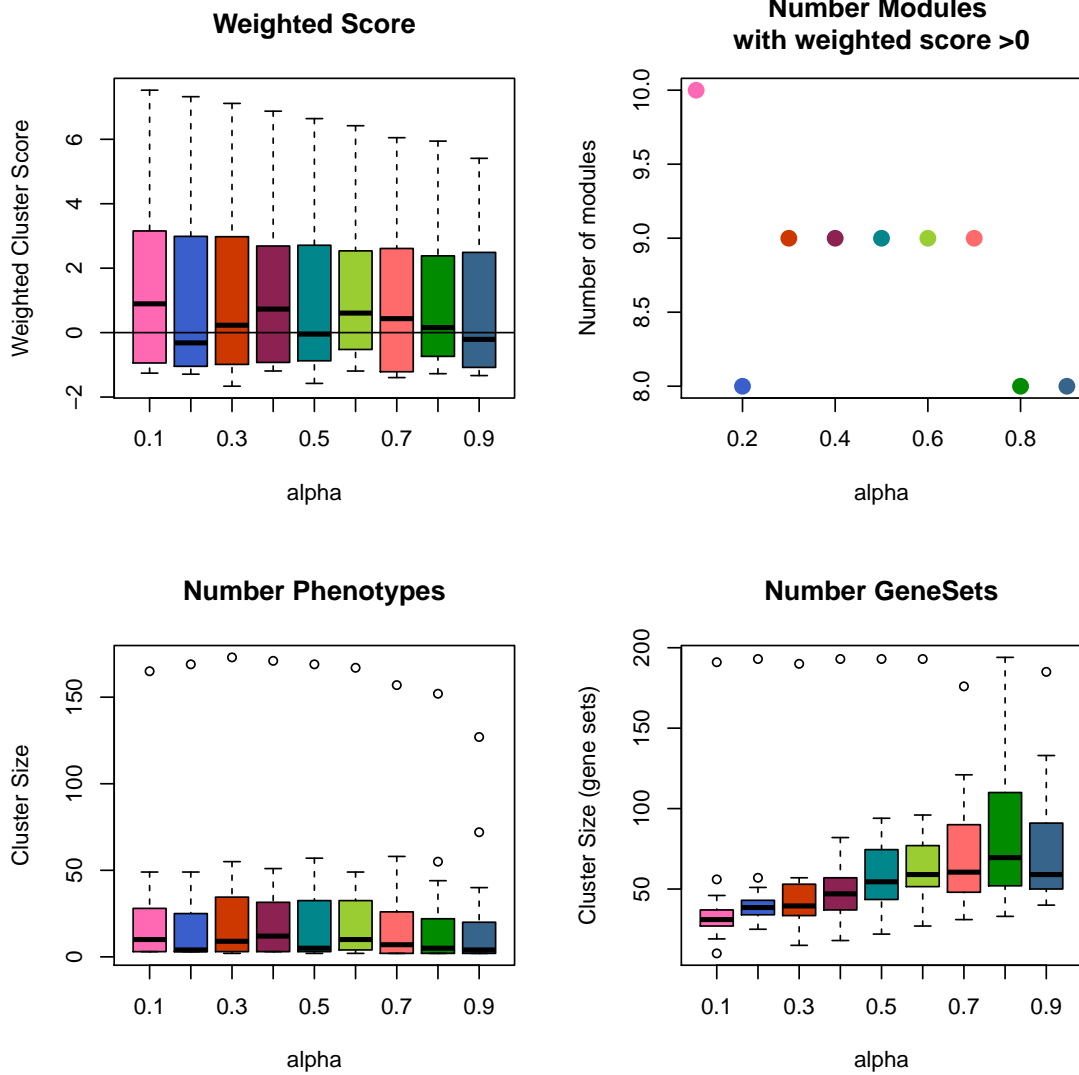

**Supplementary Fig. 3.** Effect of changes to alpha (0.1-0.9) on A) weighted score, B) number of modules with a weighted score  $\geq 0$ , C) mean number of phenotypes and D) mean number of gene sets per modules when applied to simulated data. All iBBiG parameters were run at default with the exception of alpha. The nModules was 20.

## Variance within Gene Signature Score for 100 Reruns

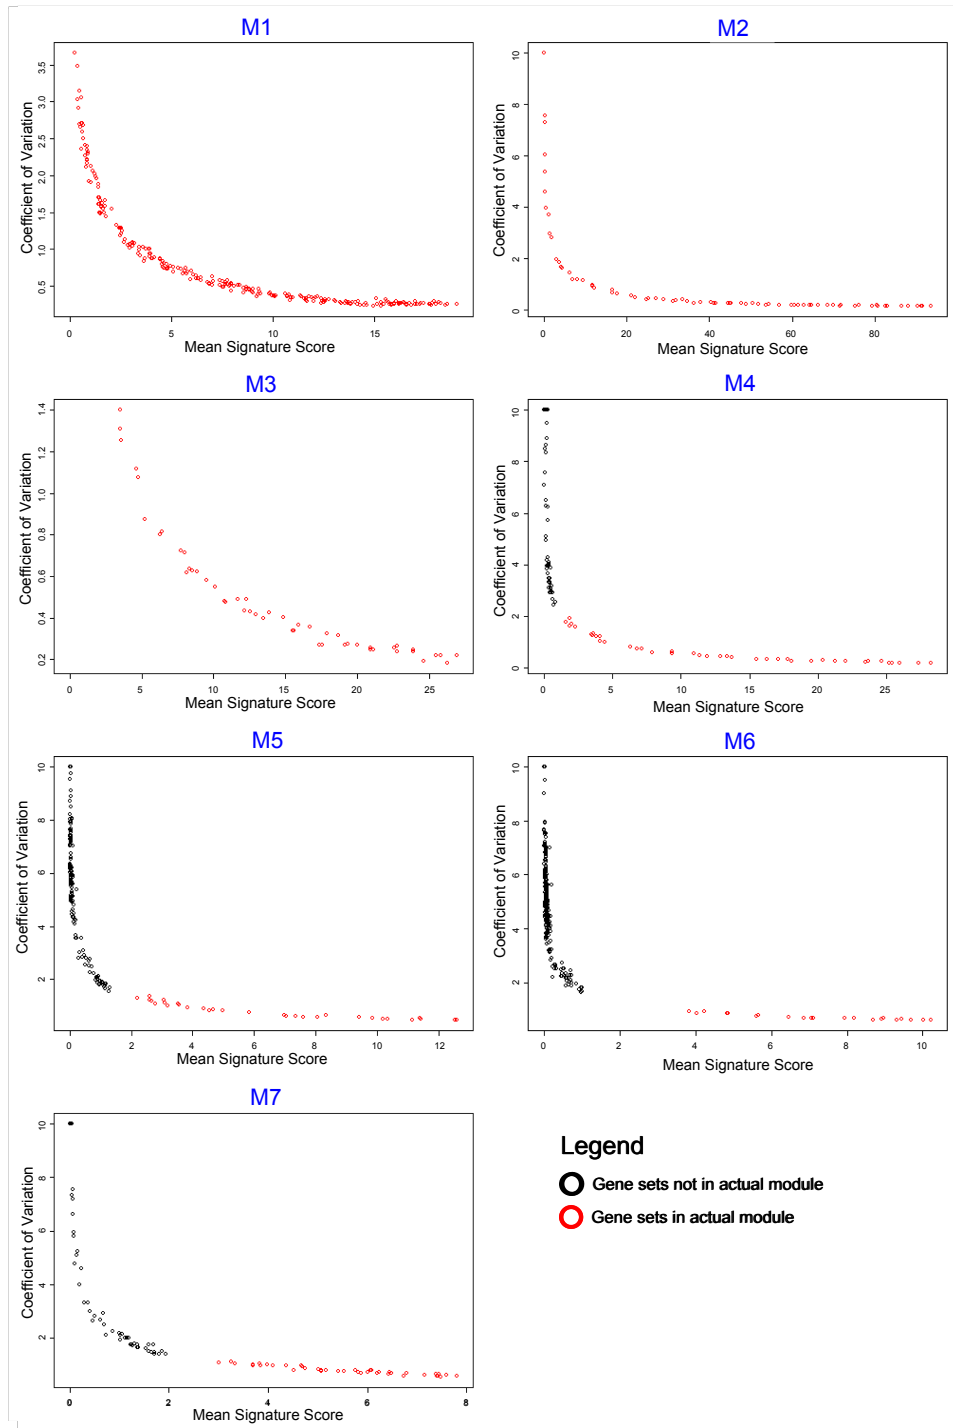

**Supplementary Fig. 4.** True gene sets scored consistently high scores and had a low coefficient of variation in 100 reruns of iBBiG applied to the simulated dataset. Plot shows variance of gene set scores in M1-M7 in the artificial dataset. Note the Y and X axis scales vary in plots M1-M7. Gene signatures with low scores have higher co-efficient of variation indicating that they occurred inconsistently in 100 rerun of iBBiG. This plot also demonstrates the usefulness of scoring of gene sets, as gene sets with higher scores are likely to be more robustly associated with a module

---

## ROC Curve for Gene Signature Scores

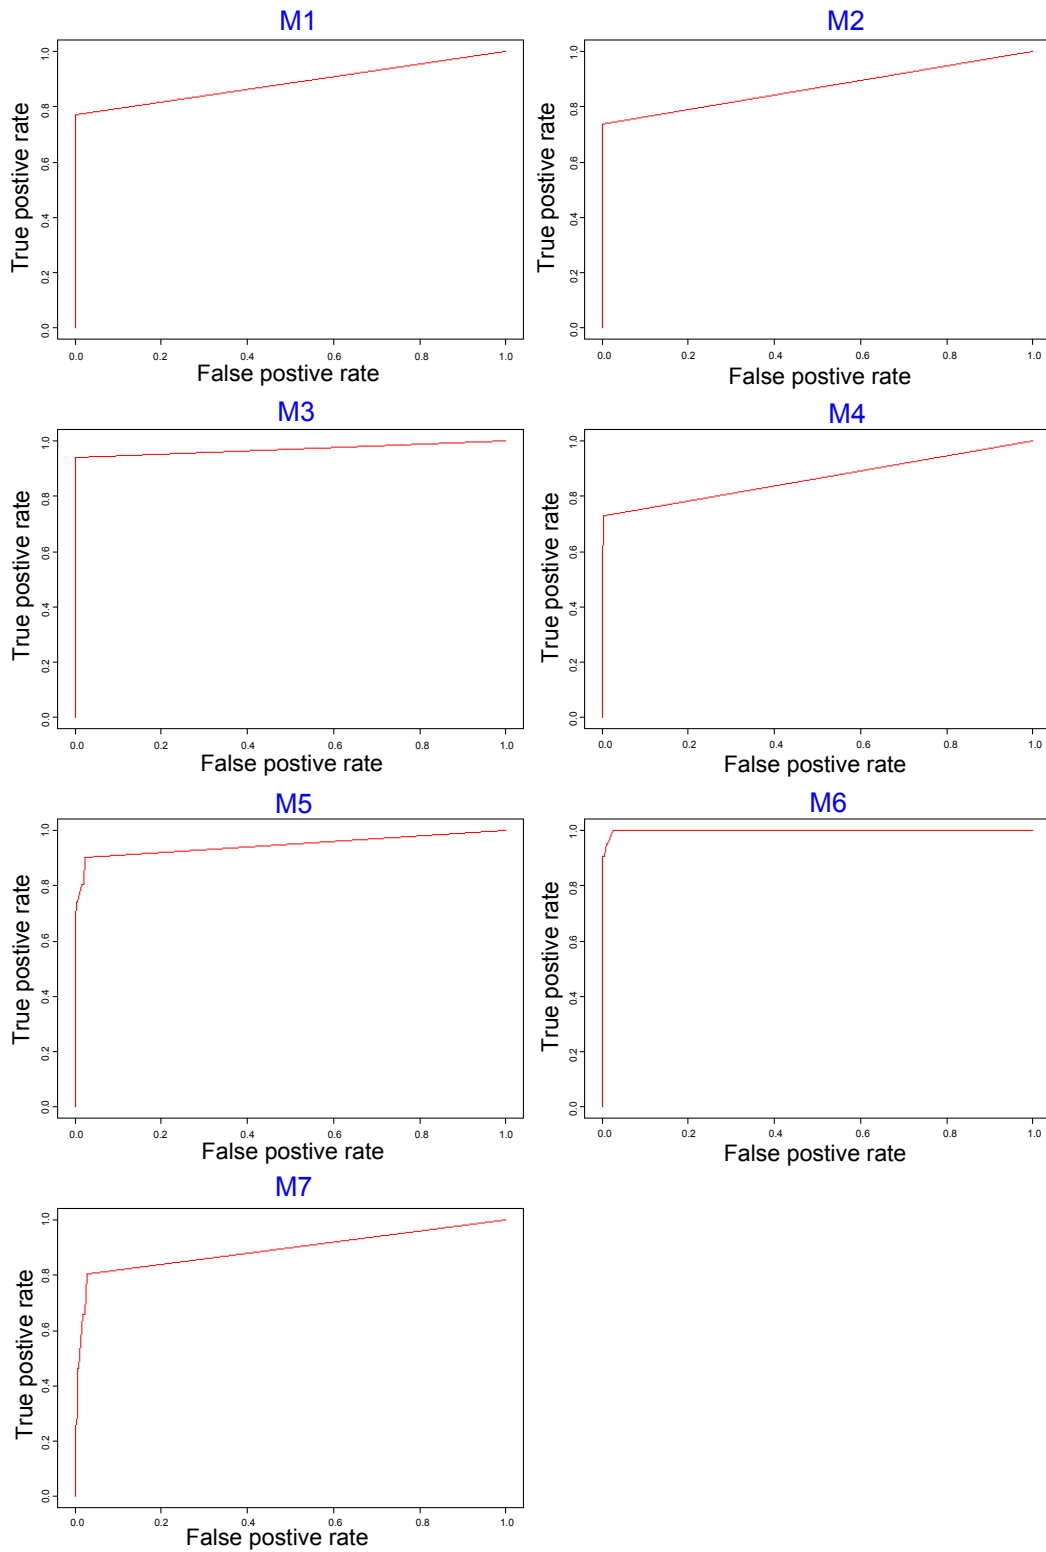

**Supplementary Fig. 5.** ROC curve of gene set score prediction in M1-M7 in the artificial dataset resulting from one run using iBBiG.

**Table 2.** Test of different weightings between homogeneity and number of phenotypes for the entropy score (alpha-parameter). The population size for all tests was set to 100, the mutation rate to 0.08, the success ratio for the offspring selection to 0.6 and the selection pressure for the parent selection to 1.2. The alpha parameter was varied between 0.1 (larger size, lower homogeneity) and 0.9 (smaller size, higher homogeneity). In order to get more stable results 100 artificial datasets were created and the results were combined.

| Alpha       | 0.1   | 0.2   | 0.3   | 0.4   | 0.5   | 0.6   | 0.7   | 0.8   | 0.9   |
|-------------|-------|-------|-------|-------|-------|-------|-------|-------|-------|
| Accuracy    | 97.3% | 98.6% | 98.7% | 98.5% | 98.0% | 96.8% | 98.3% | 95.2% | 94.5% |
| Precision   | 94.8% | 97.5% | 98.0% | 98.0% | 97.5% | 97.1% | 97.2% | 97.2% | 97.2% |
| Specificity | 99.2% | 99.6% | 99.7% | 99.7% | 99.6% | 99.6% | 99.7% | 99.7% | 99.7% |
| Sensitivity | 85.0% | 92.5% | 92.6% | 90.5% | 87.4% | 78.9% | 97.8% | 66.9% | 61.1% |

**Table 3.** Test of different population sizes. The mutation rate was set to 0.08, the success ratio for the offspring selection to 0.6, the selection pressure for the parent selection to 1.2 and the alpha parameter for the weighting of the homogeneity was set to 0.3. The population size was varied between 50 and 100. To improve stability, 100 artificial datasets were created and the results were combined.

| Population  | 15    | 25    | 35    | 50    | 100   | 150   |
|-------------|-------|-------|-------|-------|-------|-------|
| Accuracy    | 97.0% | 97.8% | 98.1% | 98.6% | 98.8% | 98.9% |
| Precision   | 95.3% | 96.7% | 97.3% | 97.6% | 98.0% | 98.1% |
| Specificity | 99.4% | 99.5% | 99.6% | 99.6% | 99.7% | 99.7% |
| Sensitivity | 81.6% | 86.5% | 88.3% | 91.7% | 93.2% | 93.8% |

**Table 4.** Test of different mutation rates for the recombination operator of the genetic algorithm. The population size for all tests was set to 100, the success ratio for the offspring selection to 0.6, the selection pressure for the parent selection to 1.2 and the alpha parameter for the weighting of the homogeneity was set to 0.3. The mutation rate was varied between 0.02 and 0.2. To improve stability, 100 artificial datasets were created and the results were combined.

| Mutation    | 0.02  | 0.04  | 0.06  | 0.08  | 0.10  | 0.12  | 0.14  | 0.16  | 0.18  | 0.20  |
|-------------|-------|-------|-------|-------|-------|-------|-------|-------|-------|-------|
| Accuracy    | 98.4% | 98.8% | 98.8% | 98.9% | 98.7% | 99.0% | 98.7% | 98.8% | 98.7% | 98.7% |
| Precision   | 97.7% | 98.0% | 98.0% | 98.1% | 98.0% | 98.1% | 97.9% | 98.0% | 97.9% | 97.8% |
| Specificity | 99.7% | 99.7% | 99.7% | 99.7% | 99.7% | 99.7% | 99.7% | 99.7% | 99.7% | 99.7% |
| Sensitivity | 90.2% | 93.1% | 92.9% | 92.5% | 92.4% | 94.3% | 92.5% | 93.3% | 92.5% | 99.2% |

**Table 5.** Test of different values for the selection pressure of the parent selection operator of the genetic algorithm. The population size for all tests was set to 100, the mutation rate was set to 0.08, the success ratio for the offspring selection to 0.6 and the alpha parameter for the weighting of the homogeneity was set to 0.3. The selection pressure was varied between 1.2 and 1.8. To improve stability, 100 artificial datasets were created and the results were combined.

| SP          | 1.1   | 1.2   | 1.3   | 1.4   | 1.5   | 1.6   | 1.7   | 1.8   | 1.9   |
|-------------|-------|-------|-------|-------|-------|-------|-------|-------|-------|
| Accuracy    | 98.2% | 98.8% | 98.8% | 98.9% | 99.0% | 98.9% | 98.8% | 99.0% | 98.7% |
| Precision   | 97.9% | 98.1% | 98.0% | 98.1% | 98.2% | 98.0% | 97.9% | 98.2% | 98.1% |
| Specificity | 99.7% | 99.7% | 99.7% | 99.7% | 99.7% | 99.7% | 99.7% | 99.7% | 99.7% |
| Sensitivity | 93.1% | 93.1% | 93.3% | 93.7% | 94.1% | 94.0% | 93.4% | 94.2% | 93.9% |

**Table 6.** Test of different values for success ratio of the offspring selection operator of the genetic algorithm. The population size for all tests was set to 100, the mutation rate was set to 0.08, the selection pressure for the parent selection to 1.2 and the alpha parameter for the weighting of the homogeneity was set to 0.3. The success ratio was varied between 0.2 and 0.6. To improve stability, 100 artificial datasets were created and the results were combined.

| SR          | 0.1   | 0.2   | 0.3   | 0.4   | 0.5   | 0.6   | 0.7   | 0.8   | 0.9   |
|-------------|-------|-------|-------|-------|-------|-------|-------|-------|-------|
| Accuracy    | 96.7% | 96.8% | 97.0% | 97.7% | 98.5% | 98.8% | 98.8% | 99.0% | 98.9% |
| Precision   | 97.3% | 97.3% | 97.5% | 97.6% | 97.6% | 97.9% | 97.9% | 98.2% | 98.0% |
| Specificity | 99.7% | 99.7% | 99.7% | 99.7% | 99.6% | 99.7% | 99.7% | 99.7% | 99.7% |
| Sensitivity | 77.8% | 78.4% | 80.0% | 85.3% | 97.0% | 93.0% | 93.4% | 94.4% | 94.0% |

**Table 7.** Sensitivity and specificity of all modules contained in the artificial dataset using varying levels of noise. The enumeration of the modules corresponds to the enumeration in Figure 1. The signal strength of each single module is stated in the first line. The higher number indicates the signal strength on the top, the lower, the signal strength on the bottom of a module. Background noise levels between 0 and 50% were tested. For each noise level the clustering was repeated 100 times, the modules in the single iterations were matched to the actual modules and the specificity and sensitivity were calculated for all of them. Results, where either sensitivity or specificity dropped under 50% are in grey. An alpha of 0.5, a selection pressure of 1.2, a population size of 100, a mutation rate of 0.8 and a success ratio of 0.6 was used for the GA.

| Dimension | Mod 1 |      | Mod 2 |      | Mod 3 |      | Mod 4 |      | Mod 5 |      | Mod 6 |      | Mod 7 |      |
|-----------|-------|------|-------|------|-------|------|-------|------|-------|------|-------|------|-------|------|
|           | 25    | 250  | 175   | 75   | 50    | 50   | 40    | 40   | 30    | 30   | 20    | 20   | 40    | 40   |
| Signal    | 0.4   | 0.9  | 0.4   | 0.8  | 0.5   | 0.8  | 0.4   | 0.9  | 0.4   | 0.8  | 0.6   | 0.9  | 0.5   | 0.6  |
| Noise     | Spec  | Sens | Spec  | Sens | Spec  | Sens | Spec  | Sens | Spec  | Sens | Spec  | Sens | Spec  | Sens |
| 0.00      | 100   | 99.5 | 100   | 99.6 | 97.7  | 69.8 | 100   | 94.0 | 98.8  | 84.2 | 99.8  | 79.3 | 99.8  | 66.0 |
| 0.05      | 100   | 100  | 99.7  | 97.9 | 100   | 91.2 | 100   | 96.3 | 98.9  | 81.9 | 100   | 89.7 | 99.9  | 67.1 |
| 0.10      | 100   | 100  | 99.7  | 97.7 | 100   | 96.7 | 100   | 97.0 | 98.8  | 83.2 | 100   | 95.5 | 99.8  | 65.2 |
| 0.15      | 100   | 100  | 99.7  | 97.4 | 100   | 97.2 | 100   | 96.7 | 98.8  | 81.3 | 100   | 87.5 | 99.8  | 66.0 |
| 0.20      | 100   | 100  | 99.7  | 97.7 | 100   | 97.0 | 100   | 96.1 | 98.7  | 79.5 | 99.9  | 85.5 | 99.6  | 62.8 |
| 0.25      | 100   | 100  | 99.7  | 97.8 | 100   | 96.6 | 100   | 96.4 | 99.1  | 45.3 | 99.7  | 62.7 | 99.6  | 40.3 |
| 0.30      | 100   | 100  | 99.6  | 97.8 | 100   | 96.4 | 99.8  | 95.6 | 99.1  | 22.7 | 99.2  | 49.1 | 99.5  | 25.7 |
| 0.35      | 100   | 100  | 99.4  | 98.7 | 99.3  | 95.2 | 99.1  | 93.2 | 98.9  | 11.6 | 98.6  | 30.0 | 98.9  | 14.7 |
| 0.40      | 99.4  | 100  | 93.2  | 92.2 | 94.8  | 87.1 | 94.0  | 46.6 | 95.6  | 11.8 | 95.6  | 16.1 | 95.3  | 12.1 |
| 0.45      | 94.7  | 100  | 81.1  | 83.7 | 86.7  | 46.8 | 89.7  | 17.7 | 90.0  | 10.5 | 90.0  | 12.0 | 89.7  | 13.8 |
| 0.50      | 84.1  | 57.7 | 51.1  | 80.7 | 84.3  | 29.4 | 84.2  | 23.5 | 84.5  | 21.6 | 84.5  | 22.5 | 84.0  | 22.5 |

**Table 8.** Average results of iBBiG analyses on artificial dataset. Default parameters; alpha of 0.3, a selection pressure of 1.2, a population size of 100, a mutation rate of 0.8 and a success ratio of 0.6 was used for the GA. 100 runs of iBBiG were performed to test the robustness of iBBiG. Results of the best run are given in Table 9. Accur, Sens and Spec are accuracy, sensitivity and specificity respectively.

| Module | JI   | Cluster Size |        | phenotype (Col) |      |      |      |      | Gene Set (Row) |      |      |      |      |
|--------|------|--------------|--------|-----------------|------|------|------|------|----------------|------|------|------|------|
|        |      | nRow         | nCol   | Accur           | Sens | Spec | PPV  | NPV  | Accur          | Sens | Spec | PPV  | NPV  |
| M1     | 0.99 | 114.88       | 24.73  | 1.00            | 0.99 | 1.00 | 1.00 | 1.00 | 0.66           | 0.46 | 1.00 | 1.00 | 0.53 |
| M2     | 0.98 | 39.04        | 173.79 | 0.99            | 0.99 | 1.00 | 1.00 | 0.99 | 0.91           | 0.52 | 1.00 | 1.00 | 0.90 |
| M3     | 0.99 | 33.40        | 49.34  | 1.00            | 0.99 | 1.00 | 1.00 | 1.00 | 0.96           | 0.67 | 1.00 | 1.00 | 0.95 |
| M4     | 0.97 | 22.57        | 39.41  | 1.00            | 0.97 | 1.00 | 0.99 | 1.00 | 0.95           | 0.56 | 1.00 | 0.99 | 0.95 |
| M5     | 0.82 | 19.80        | 34.96  | 0.97            | 0.87 | 0.98 | 0.95 | 0.99 | 0.96           | 0.54 | 0.99 | 0.87 | 0.96 |
| M6     | 0.70 | 19.42        | 36.96  | 0.94            | 0.82 | 0.95 | 0.76 | 0.99 | 0.96           | 0.57 | 0.98 | 0.70 | 0.98 |
| M7     | 0.74 | 27.19        | 29.82  | 0.97            | 0.74 | 1.00 | 1.00 | 0.97 | 0.95           | 0.58 | 0.99 | 0.86 | 0.96 |

**Table 9.** The best performance of iBBiG in results of Table 8 100 runs. The run with the highest JI to phenotype (columns) is reported. (The same approach to select the best results was used in Table reftable:BimaxBest. Accur, Sens and Spec are accuracy, sensitivity and specificity respectively)

| Module | JI   | Cluster Size |      | phenotype (Col) |      |      |      |      | Gene Set (Row) |      |      |      |      |
|--------|------|--------------|------|-----------------|------|------|------|------|----------------|------|------|------|------|
|        |      | nRow         | nCol | Accur           | Sens | Spec | PPV  | NPV  | Accur          | Sens | Spec | PPV  | NPV  |
| M1     | 1.00 | 137          | 25   | 1.00            | 1.00 | 1.00 | 1.00 | 1.00 | 0.72           | 0.55 | 1.00 | 1.00 | 0.57 |
| M2     | 0.99 | 46           | 173  | 0.99            | 0.99 | 1.00 | 1.00 | 0.99 | 0.93           | 0.61 | 1.00 | 1.00 | 0.92 |
| M3     | 1.00 | 42           | 50   | 1.00            | 1.00 | 1.00 | 1.00 | 1.00 | 0.98           | 0.84 | 1.00 | 1.00 | 0.98 |
| M4     | 1.00 | 26           | 40   | 1.00            | 1.00 | 1.00 | 1.00 | 1.00 | 0.96           | 0.65 | 1.00 | 1.00 | 0.96 |
| M5     | 0.97 | 23           | 29   | 1.00            | 0.97 | 1.00 | 1.00 | 1.00 | 0.97           | 0.70 | 0.99 | 0.91 | 0.98 |
| M6     | 1.00 | 19           | 20   | 1.00            | 1.00 | 1.00 | 1.00 | 1.00 | 1.00           | 0.95 | 1.00 | 1.00 | 1.00 |
| M7     | 0.90 | 35           | 36   | 0.99            | 0.90 | 1.00 | 1.00 | 0.99 | 0.97           | 0.78 | 0.99 | 0.89 | 0.97 |



#### 4 COMPARISON TO OTHER METHODS:

To visualize the bi-clustering results of iBBiG, FABIA, COALESCE, Hierarchical clustering and k-means clustering, the artificial dataset was superimposed with the extracted clustering of phenotypes and gene signatures, without changing the order of rows or columns. The exception was hierarchical clustering which is a global method that does not determine specific clusters; hence the resulting order of gene sets and phenotypes was used and the actual modules color-coded as they were in the artificial dataset. The rows and columns of the breast cancer dataset were rearranged so that the largest module is in the upper left corner, followed diagonally by the second largest and so forth. Overlapping phenotypes or gene sets are shown in the first module they occur in, but in the color coding of the last module they are found to show the overlaps between modules.

**Table 10.** Result of Hierarchical Clustering using binary distance and Ward's minimum variance clustering in both directions. The dendrogram was cut to give 6 clusters, as K=6 was found to be the minimal number to give maximum average JI to clusters M1-M7. Accur. Sens and Spec are accuracy, sensitivity and specificity respectively.

| Module | Best Cluster | JI   | Cluster Size |        | phenotype (Col) |      |      |      |      | Gene Set (Row) |      |      |      |      |
|--------|--------------|------|--------------|--------|-----------------|------|------|------|------|----------------|------|------|------|------|
|        |              |      | nRow         | nCol   | Accur           | Sens | Spec | PPV  | NPV  | Accur          | Sens | Spec | PPV  | NPV  |
| M1     | 6            | 1.00 | 75.00        | 25.00  | 1.00            | 1.00 | 1.00 | 1.00 | 1.00 | 0.44           | 0.20 | 0.83 | 0.67 | 0.38 |
| M2     | 3            | 0.57 | 30.00        | 100.00 | 0.81            | 0.57 | 1.00 | 1.00 | 0.75 | 0.74           | 0.00 | 0.91 | 0.00 | 0.80 |
| M3     | 1            | 1.00 | 48.00        | 50.00  | 1.00            | 1.00 | 1.00 | 1.00 | 1.00 | 0.99           | 0.96 | 1.00 | 1.00 | 0.99 |
| M4     | 2            | 0.85 | 79.00        | 36.00  | 0.98            | 0.88 | 1.00 | 0.97 | 0.99 | 0.70           | 0.00 | 0.78 | 0.00 | 0.88 |
| M5     | 3            | 0.24 | 30.00        | 100.00 | 0.80            | 0.83 | 0.80 | 0.25 | 0.98 | 0.85           | 0.00 | 0.92 | 0.00 | 0.92 |
| M6     | 3            | 0.20 | 30.00        | 100.00 | 0.80            | 1.00 | 0.79 | 0.20 | 1.00 | 0.88           | 0.00 | 0.92 | 0.00 | 0.95 |
| M7     | 4            | 0.97 | 128.00       | 39.00  | 1.00            | 0.97 | 1.00 | 1.00 | 1.00 | 0.58           | 0.00 | 0.64 | 0.00 | 0.85 |

**Table 11.** Results of COALESCE with default parameters. JI between columns and rows are provided. Accur. Sens and Spec are accuracy, sensitivity and specificity respectively. 5 clusters were identified and the cluster which had the highest JI to each module is listed.

| Module | Best Cluster | JI   | Cluster Size |      | phenotype (Col) |      |      |      |      | Gene Set (Row) |      |      |      |      |
|--------|--------------|------|--------------|------|-----------------|------|------|------|------|----------------|------|------|------|------|
|        |              |      | nRow         | nCol | Accur           | Sens | Spec | PPV  | NPV  | Accur          | Sens | Spec | PPV  | NPV  |
| M1     | 1            | 0.32 | 50           | 74   | 0.87            | 0.96 | 0.87 | 0.32 | 1.00 | 0.25           | 0.00 | 0.67 | 0.00 | 0.29 |
| M2     | 4            | 0.99 | 75           | 176  | 1.00            | 1.00 | 1.00 | 0.99 | 1.00 | 1.00           | 1.00 | 1.00 | 1.00 | 1.00 |
| M3     | 1            | 0.68 | 50           | 74   | 0.94            | 1.00 | 0.93 | 0.68 | 1.00 | 1.00           | 1.00 | 1.00 | 1.00 | 1.00 |
| M4     | 2            | 0.67 | 38           | 60   | 0.95            | 1.00 | 0.94 | 0.67 | 1.00 | 0.99           | 0.95 | 1.00 | 1.00 | 0.99 |
| M5     | 3            | 0.70 | 36           | 43   | 0.97            | 1.00 | 0.96 | 0.70 | 1.00 | 0.98           | 0.97 | 0.98 | 0.81 | 1.00 |
| M6     | 4            | 0.11 | 75           | 176  | 0.61            | 1.00 | 0.59 | 0.11 | 1.00 | 0.76           | 0.00 | 0.80 | 0.00 | 0.94 |
| M7     | 5            | 0.95 | 60           | 42   | 0.99            | 1.00 | 0.99 | 0.95 | 1.00 | 0.95           | 1.00 | 0.94 | 0.67 | 1.00 |

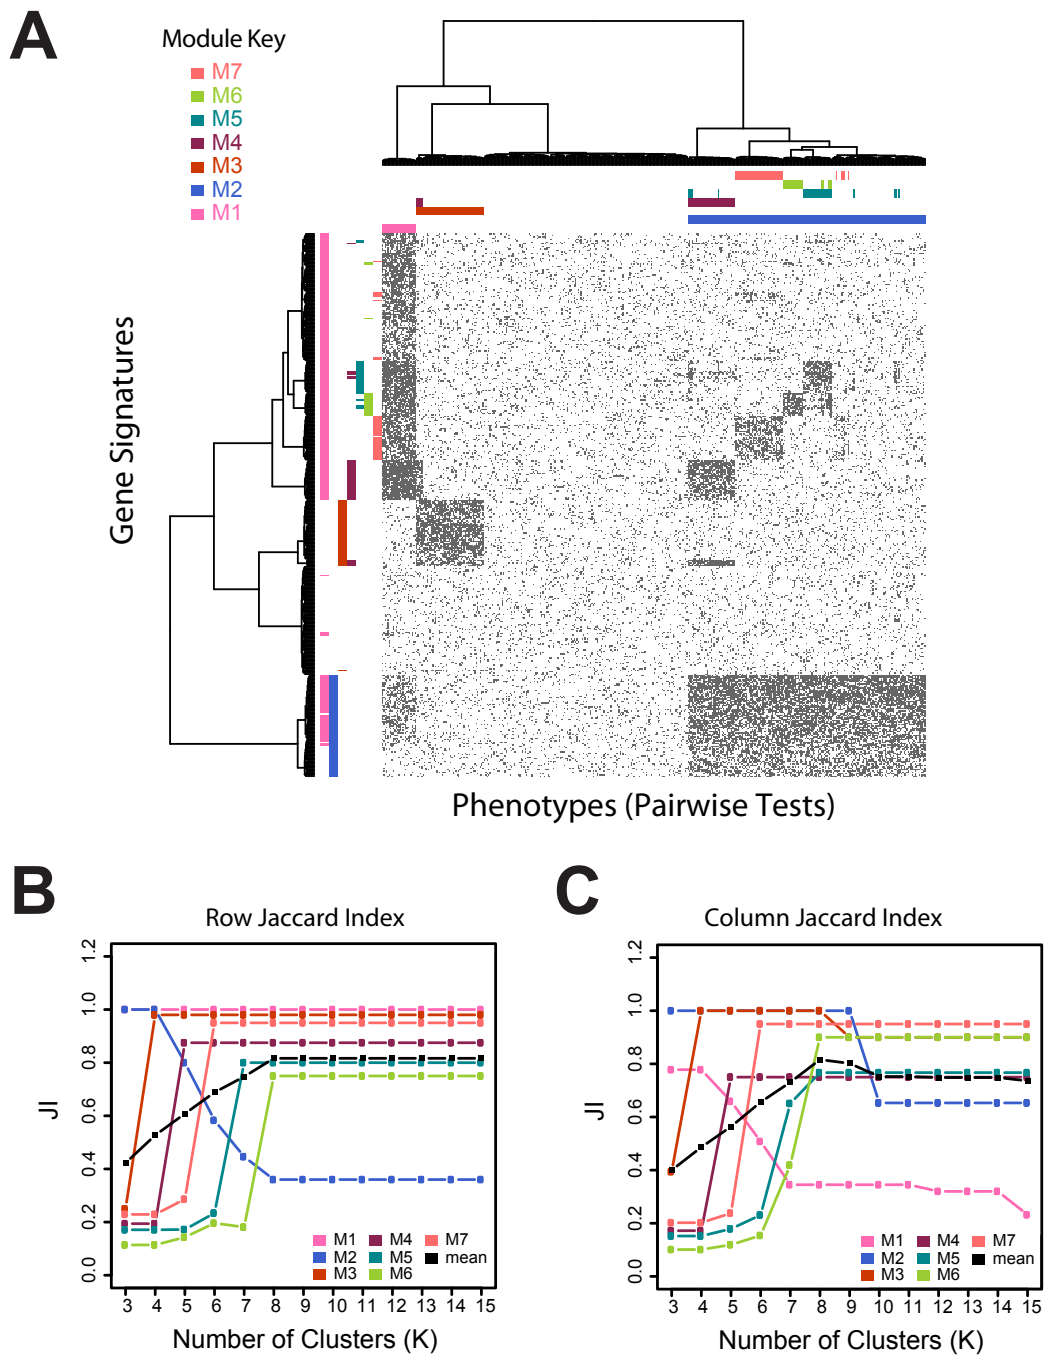

**Supplementary Fig. 6.** Hierarchical clustering of the simulated dataset showing A) heatmap and dendrogram of results in which the color bars highlight the true modules. The dendrogram was cut to give 3-15 cluster ( $K=3:15$ ) and the Jaccard Index of each module to the true modules was calculated for each  $K$ . Plots show the maximum Jaccard Index of the best cluster to each B) row (gene set) or C) column (phenotype) of true clusters for each  $K$ .

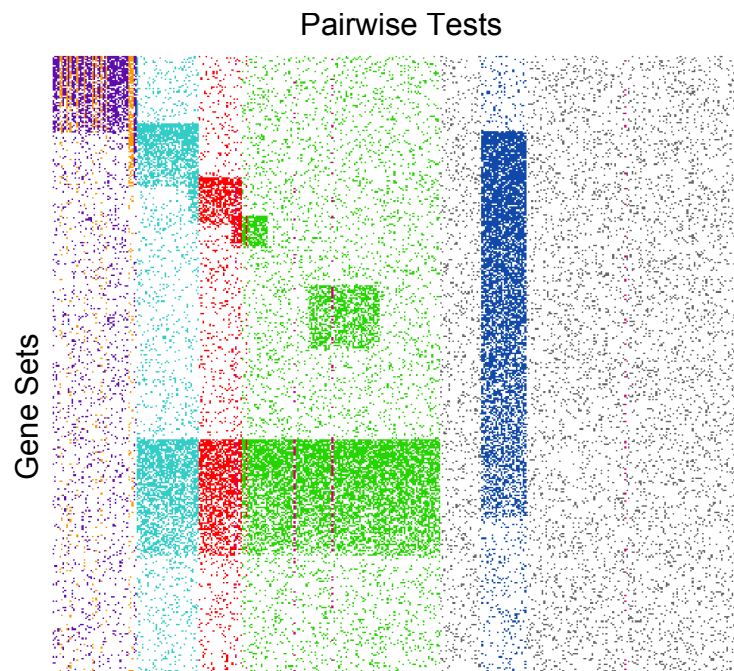

**Supplementary Fig. 7.** K-means clustering of the artificial dataset using 7 centers and applied only to phenotypes. Since this method clusters only in one dimension it is not able to handle overlaps of phenotypes.

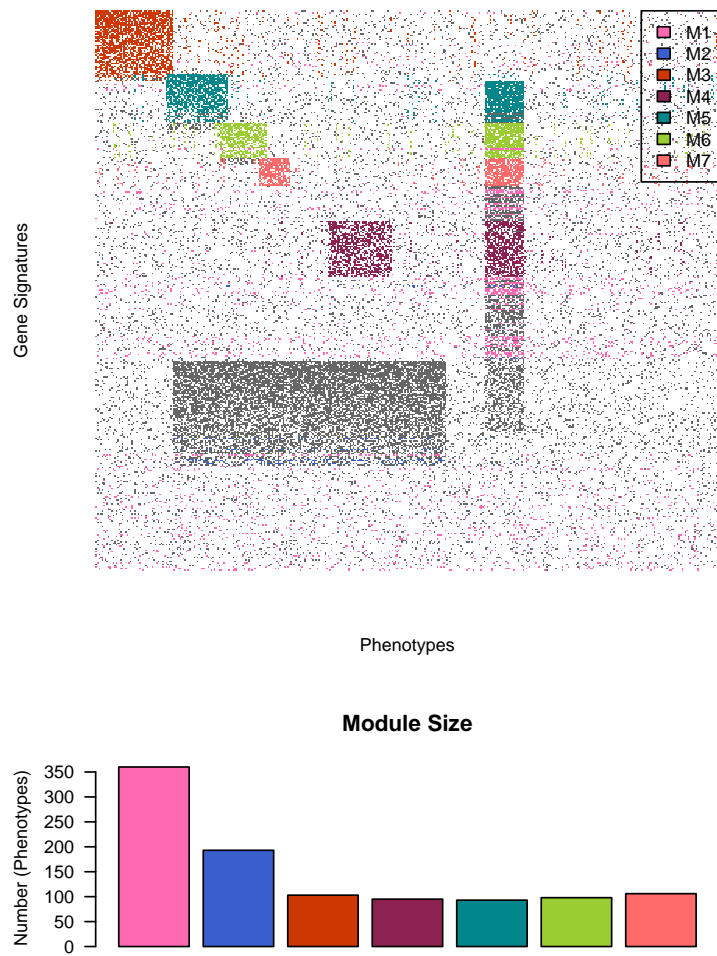

**Supplementary Fig. 8.** FABIA bi-clustering determined most of the smaller modules (M3, M5-M7) correctly, but also produced large modules which lacked specificity; M1 contained 360/400 phenotypes in it and high number of false positives.

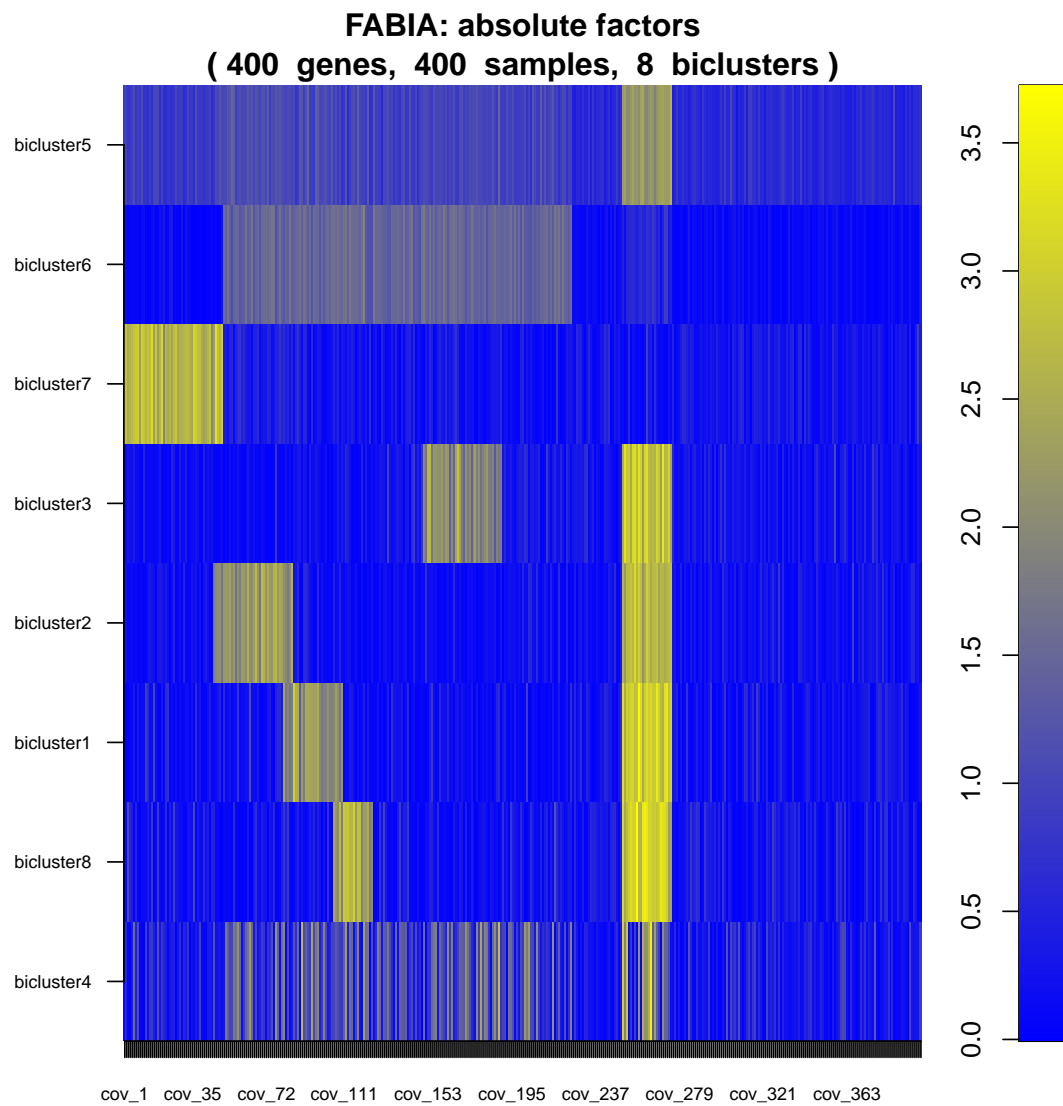

**Supplementary Fig. 9.** absolute loading on each factor from FABIA. Note some factors have a large numbers of phenotypes with high weights

**Table 12.** FABIA with parameters  $p=8$ , default  $\alpha=0.1$ ,  $cyc=1000$ . Alpha is the sparseness loading,  $p$  is the number of clusters and  $cyc$  is the number of cycles. Accur, Sens, Spec, PPV and NPV are accuracy, sensitivity, specificity positive predictive value (precision) and negative predictive value respectively FABIA identified large clusters with many false positives

| Module | JI   | Cluster Size |      | phenotype (Col) |      |      |      |      | Gene Set (row) |      |      |      |      |
|--------|------|--------------|------|-----------------|------|------|------|------|----------------|------|------|------|------|
|        |      | nRow         | nCol | Accur           | Sens | Spec | PPV  | NPV  | Accur          | Sens | Spec | PPV  | NPV  |
| M1     | 0.16 | 87           | 358  | 0.17            | 1.00 | 0.11 | 0.07 | 1.00 | 0.39           | 0.19 | 0.73 | 0.54 | 0.35 |
| M2     | 0.09 | 12           | 185  | 0.97            | 1.00 | 0.96 | 0.95 | 1.00 | 0.82           | 0.09 | 0.98 | 0.58 | 0.82 |
| M3     | 0.90 | 45           | 111  | 0.85            | 1.00 | 0.83 | 0.45 | 1.00 | 0.99           | 0.90 | 1.00 | 1.00 | 0.99 |
| M4     | 0.80 | 32           | 79   | 0.90            | 1.00 | 0.89 | 0.51 | 1.00 | 0.98           | 0.80 | 1.00 | 1.00 | 0.98 |
| M5     | 0.73 | 22           | 194  | 0.59            | 1.00 | 0.56 | 0.15 | 1.00 | 0.98           | 0.73 | 1.00 | 1.00 | 0.98 |
| M6     | 1.00 | 20           | 95   | 0.81            | 1.00 | 0.80 | 0.21 | 1.00 | 1.00           | 1.00 | 1.00 | 1.00 | 1.00 |
| M7     | 0.68 | 27           | 100  | 0.85            | 1.00 | 0.83 | 0.40 | 1.00 | 0.97           | 0.68 | 1.00 | 1.00 | 0.96 |

**Table 13.** Results of FABIA with parameters  $p=8$ ,  $\alpha=0.2$ ,  $cyc=1000$ . Alpha is the sparseness loading,  $p$  is the number of clusters and  $cyc$  is the number of cycles. Accur, Sens, Spec, PPV and NPV are accuracy, sensitivity, specificity positive predictive value (precision) and negative predictive value respectively FABIA identified large clusters with many false positives.

| Module | JI   | Cluster Size |      | phenotype (Col) |      |      |      |      | Gene Set (row) |      |      |      |      |
|--------|------|--------------|------|-----------------|------|------|------|------|----------------|------|------|------|------|
|        |      | nRow         | nCol | Accur           | Sens | Spec | PPV  | NPV  | Accur          | Sens | Spec | PPV  | NPV  |
| M1     | 0.15 | 83           | 352  | 0.18            | 1.00 | 0.13 | 0.07 | 1.00 | 0.39           | 0.18 | 0.74 | 0.53 | 0.35 |
| M2     | 0.09 | 10           | 182  | 0.98            | 1.00 | 0.97 | 0.96 | 1.00 | 0.82           | 0.09 | 0.99 | 0.70 | 0.83 |
| M3     | 0.90 | 45           | 97   | 0.88            | 1.00 | 0.87 | 0.52 | 1.00 | 0.99           | 0.90 | 1.00 | 1.00 | 0.99 |
| M4     | 0.80 | 32           | 105  | 0.84            | 1.00 | 0.82 | 0.38 | 1.00 | 0.98           | 0.80 | 1.00 | 1.00 | 0.98 |
| M5     | 0.77 | 23           | 127  | 0.76            | 1.00 | 0.74 | 0.24 | 1.00 | 0.98           | 0.77 | 1.00 | 1.00 | 0.98 |
| M6     | 1.00 | 20           | 145  | 0.69            | 1.00 | 0.67 | 0.14 | 1.00 | 1.00           | 1.00 | 1.00 | 1.00 | 1.00 |
| M7     | 0.82 | 33           | 111  | 0.82            | 1.00 | 0.80 | 0.36 | 1.00 | 0.98           | 0.82 | 1.00 | 1.00 | 0.98 |

**Table 14.** Results of FABIA with parameters  $p=8$ ,  $\alpha=0.3$ ,  $cyc=1000$ . Alpha is the sparseness loading,  $p$  is the number of clusters and  $cyc$  is the number of cycles. Accur, Sens, Spec, PPV and NPV are accuracy, sensitivity, specificity positive predictive value (precision) and negative predictive value respectively. FABIA identified large clusters with many false positives.

| Module | JI   | Cluster Size |      | phenotype (Col) |      |      |      |      | Gene Set (row) |      |      |      |      |
|--------|------|--------------|------|-----------------|------|------|------|------|----------------|------|------|------|------|
|        |      | nRow         | nCol | Accur           | Sens | Spec | PPV  | NPV  | Accur          | Sens | Spec | PPV  | NPV  |
| M1     | 0.27 | 34           | 93   | 0.83            | 1.00 | 0.82 | 0.27 | 1.00 | 0.44           | 0.12 | 0.97 | 0.88 | 0.40 |
| M2     | 0.88 | 11           | 198  | 0.94            | 1.00 | 0.90 | 0.88 | 1.00 | 0.83           | 0.12 | 0.99 | 0.82 | 0.83 |
| M3     | 0.24 | 49           | 212  | 0.59            | 1.00 | 0.54 | 0.24 | 1.00 | 1.00           | 0.98 | 1.00 | 1.00 | 1.00 |
| M4     | 0.43 | 34           | 93   | 0.87            | 1.00 | 0.85 | 0.43 | 1.00 | 0.98           | 0.85 | 1.00 | 1.00 | 0.98 |
| M5     | 0.21 | 24           | 143  | 0.72            | 1.00 | 0.69 | 0.21 | 1.00 | 0.98           | 0.80 | 1.00 | 1.00 | 0.98 |
| M6     | 0.18 | 20           | 113  | 0.77            | 1.00 | 0.76 | 0.18 | 1.00 | 1.00           | 1.00 | 1.00 | 1.00 | 1.00 |
| M7     | 0.25 | 39           | 158  | 0.70            | 1.00 | 0.67 | 0.25 | 1.00 | 1.00           | 0.97 | 1.00 | 1.00 | 1.00 |

**Table 15.** The maximum Jaccard similarity Index (JI) between M1-M7 and 200 clusters extracted from Bimax in which the row size (minr) and column (minc) size ranged 2-26 and 2-20 respectively. JI values are calculated on columns (phenotypes) only. nd indicates that no clusters were found when bimax was performed using those parameters

| Module | Column size | Row Size |       |       |       |       |       |       |       |       |       |       |       |       |  |
|--------|-------------|----------|-------|-------|-------|-------|-------|-------|-------|-------|-------|-------|-------|-------|--|
|        |             | 2        | 4     | 6     | 8     | 10    | 12    | 14    | 16    | 18    | 20    | 22    | 24    | 26    |  |
| M1     | 2           | 0        | 0     | 0     | 0     | 0     | 0     | 0     | 0     | 0     | 0     | 0     | 0     | 0     |  |
| M1     | 4           | 0        | 0     | 0     | 0     | 0     | 0     | 0     | 0     | 0     | 0     | 0.24  | 0.28  | 0.24  |  |
| M1     | 6           | 0        | 0     | 0     | 0     | 0     | 0     | 0     | 0     | 0.36  | 0.36  | 0.36  | 0.32  | 0.32  |  |
| M1     | 8           | 0        | 0     | 0     | 0     | 0     | 0     | 0.36  | 0.4   | 0.36  | 0.4   | 0.36  | 0.36  | 0.32  |  |
| M1     | 10          | 0        | 0     | 0     | 0     | 0     | 0     | 0.029 | 0.44  | 0.44  | 0.44  | 0.44  | 0.4   | 0.44  |  |
| M1     | 12          | 0        | 0     | 0     | 0     | 0.52  | 0.423 | 0.48  | 0.52  | 0.48  | 0.52  | 0.48  | nd    | nd    |  |
| M1     | 14          | 0        | 0     | 0     | 0.6   | 0     | 0.56  | 0.56  | 0.6   | 0.56  | nd    | nd    | nd    | nd    |  |
| M1     | 16          | 0        | 0     | 0     | 0.025 | 0.051 | 0.68  | 0.64  | nd    | nd    | nd    | nd    | nd    | nd    |  |
| M1     | 18          | 0        | 0     | 0.536 | 0.387 | 0.536 | 0.024 | nd    | nd    | nd    | nd    | nd    | nd    | nd    |  |
| M1     | 20          | 0        | 0     | 0.667 | 0     | 0.023 | 0     | nd    | nd    | nd    | nd    | nd    | nd    | nd    |  |
| M2     | 2           | 0        | 0     | 0     | 0     | 0     | 0     | 0     | 0     | 0     | 0     | 0     | 0     | 0     |  |
| M2     | 4           | 0        | 0     | 0     | 0     | 0     | 0     | 0     | 0     | 0     | 0     | 0.023 | 0.023 | 0.011 |  |
| M2     | 6           | 0        | 0     | 0     | 0     | 0     | 0     | 0     | 0     | 0.034 | 0.034 | 0.006 | 0     | 0     |  |
| M2     | 8           | 0        | 0     | 0     | 0     | 0     | 0     | 0.011 | 0     | 0.051 | 0     | 0     | 0     | 0     |  |
| M2     | 10          | 0        | 0     | 0     | 0     | 0     | 0.063 | 0.063 | 0     | 0     | 0     | 0     | 0     | 0     |  |
| M2     | 12          | 0        | 0     | 0     | 0     | 0.011 | 0.074 | 0     | 0     | 0.005 | 0     | 0     | nd    | nd    |  |
| M2     | 14          | 0        | 0     | 0     | 0.074 | 0.091 | 0.086 | 0.08  | 0.005 | 0     | nd    | nd    | nd    | nd    |  |
| M2     | 16          | 0        | 0     | 0     | 0.114 | 0.12  | 0.109 | 0     | nd    | nd    | nd    | nd    | nd    | nd    |  |
| M2     | 18          | 0.005    | 0.005 | 0.096 | 0.12  | 0.114 | 0.114 | nd    | nd    | nd    | nd    | nd    | nd    | nd    |  |
| M2     | 20          | 0.005    | 0     | 0.102 | 0.143 | 0.137 | 0.114 | nd    | nd    | nd    | nd    | nd    | nd    | nd    |  |
| M3     | 2           | 0.14     | 0.14  | 0.14  | 0.14  | 0.14  | 0.12  | 0.1   | 0.1   | 0.1   | 0.1   | 0.08  | 0.08  | 0.06  |  |
| M3     | 4           | 0.16     | 0.16  | 0.16  | 0.16  | 0.14  | 0.12  | 0.12  | 0.12  | 0.12  | 0.1   | 0.08  | 0.08  | 0.08  |  |
| M3     | 6           | 0.2      | 0.2   | 0.2   | 0.2   | 0.18  | 0.16  | 0.14  | 0.14  | 0.12  | 0     | 0     | 0     | 0     |  |
| M3     | 8           | 0.24     | 0.24  | 0.24  | 0.22  | 0.18  | 0.18  | 0.16  | 0     | 0     | 0     | 0     | 0     | 0     |  |
| M3     | 10          | 0.3      | 0.3   | 0.28  | 0.24  | 0.24  | 0.2   | 0     | 0     | 0     | 0     | 0     | 0     | 0     |  |
| M3     | 12          | 0.34     | 0.34  | 0.34  | 0.28  | 0.24  | 0     | 0     | 0     | 0     | 0     | 0     | nd    | nd    |  |
| M3     | 14          | 0.4      | 0.4   | 0.34  | 0.3   | 0     | 0     | 0     | 0     | 0     | nd    | nd    | nd    | nd    |  |
| M3     | 16          | 0.4      | 0.46  | 0.38  | 0     | 0     | 0     | 0     | nd    | nd    | nd    | nd    | nd    | nd    |  |
| M3     | 18          | 0.529    | 0.48  | 0.38  | 0     | 0     | 0     | nd    | nd    | nd    | nd    | nd    | nd    | nd    |  |
| M3     | 20          | 0.56     | 0.5   | 0.029 | 0     | 0     | 0     | nd    | nd    | nd    | nd    | nd    | nd    | nd    |  |
| M4     | 2           | 0.024    | 0.024 | 0.024 | 0.024 | 0.024 | 0.024 | 0.024 | 0.024 | 0.05  | 0.05  | 0.05  | 0.05  | 0.075 |  |
| M4     | 4           | 0.023    | 0.023 | 0.023 | 0.023 | 0.023 | 0.023 | 0.048 | 0.048 | 0.048 | 0.1   | 0.1   | 0.1   | 0.1   |  |
| M4     | 6           | 0.045    | 0.045 | 0.045 | 0.045 | 0.045 | 0.045 | 0.07  | 0.095 | 0.045 | 0.15  | 0     | 0     | 0     |  |
| M4     | 8           | 0.043    | 0.043 | 0.043 | 0.043 | 0.043 | 0.091 | 0.067 | 0     | 0.2   | 0     | 0     | 0     | 0     |  |
| M4     | 10          | 0.064    | 0.064 | 0.064 | 0.087 | 0.087 | 0.087 | 0.042 | 0     | 0     | 0     | 0     | 0     | 0     |  |
| M4     | 12          | 0.083    | 0.083 | 0.083 | 0.083 | 0.061 | 0.106 | 0     | 0     | 0.02  | 0     | 0     | nd    | nd    |  |
| M4     | 14          | 0.08     | 0.08  | 0.08  | 0.08  | 0.102 | 0.08  | 0.059 | 0.019 | 0     | nd    | nd    | nd    | nd    |  |
| M4     | 16          | 0.077    | 0.077 | 0.077 | 0.143 | 0.037 | 0.077 | 0     | nd    | nd    | nd    | nd    | nd    | nd    |  |
| M4     | 18          | 0.074    | 0.074 | 0.283 | 0.16  | 0.137 | 0.094 | nd    | nd    | nd    | nd    | nd    | nd    | nd    |  |
| M4     | 20          | 0.071    | 0.071 | 0.196 | 0.154 | 0.111 | 0.034 | nd    | nd    | nd    | nd    | nd    | nd    | nd    |  |
| M5     | 2           | 0        | 0     | 0     | 0     | 0     | 0     | 0     | 0     | 0     | 0     | 0     | 0     | 0     |  |
| M5     | 4           | 0        | 0     | 0     | 0     | 0     | 0     | 0     | 0     | 0     | 0     | 0.097 | 0.03  | 0.062 |  |
| M5     | 6           | 0        | 0     | 0     | 0     | 0     | 0     | 0     | 0     | 0.029 | 0.029 | 0.029 | 0     | 0     |  |
| M5     | 8           | 0        | 0     | 0     | 0     | 0     | 0     | 0.027 | 0     | 0.118 | 0     | 0     | 0     | 0     |  |
| M5     | 10          | 0        | 0     | 0     | 0     | 0     | 0.111 | 0.111 | 0     | 0     | 0     | 0     | 0     | 0     |  |
| M5     | 12          | 0        | 0     | 0     | 0     | 0.05  | 0.167 | 0     | 0     | 0.024 | 0     | 0     | nd    | nd    |  |
| M5     | 14          | 0        | 0     | 0     | 0.048 | 0.189 | 0.158 | 0.073 | 0.023 | 0     | nd    | nd    | nd    | nd    |  |
| M5     | 16          | 0        | 0     | 0     | 0.095 | 0.15  | 0.15  | 0     | nd    | nd    | nd    | nd    | nd    | nd    |  |
| M5     | 18          | 0        | 0     | 0.091 | 0.116 | 0.171 | 0.143 | nd    | nd    | nd    | nd    | nd    | nd    | nd    |  |
| M5     | 20          | 0        | 0     | 0.02  | 0.136 | 0.163 | 0.111 | nd    | nd    | nd    | nd    | nd    | nd    | nd    |  |

**Table 15. Continued:** The maximum Jaccard similarity Index (JI) between M1-M7 and 200 clusters extracted from Bimax in which the row size (minr) and column (minc) size ranged 2-26 and 2-20 respectively. JI values are calculated on columns (phenotypes) only. nd indicates that no clusters were found when bimax was performed using those parameters.

| Module | Column size | Row Size |   |       |       |       |       |       |    |       |    |       |       |       |
|--------|-------------|----------|---|-------|-------|-------|-------|-------|----|-------|----|-------|-------|-------|
|        |             | 2        | 4 | 6     | 8     | 10    | 12    | 14    | 16 | 18    | 20 | 22    | 24    | 26    |
| M6     | 2           | 0        | 0 | 0     | 0     | 0     | 0     | 0     | 0  | 0     | 0  | 0     | 0     | 0     |
| M6     | 4           | 0        | 0 | 0     | 0     | 0     | 0     | 0     | 0  | 0     | 0  | 0.043 | 0.043 | 0.043 |
| M6     | 6           | 0        | 0 | 0     | 0     | 0     | 0     | 0     | 0  | 0.04  | 0  | 0     | 0     | 0     |
| M6     | 8           | 0        | 0 | 0     | 0     | 0     | 0     | 0     | 0  | 0.167 | 0  | 0     | 0     | 0     |
| M6     | 10          | 0        | 0 | 0     | 0     | 0     | 0.034 | 0.154 | 0  | 0     | 0  | 0     | 0     | 0     |
| M6     | 12          | 0        | 0 | 0     | 0     | 0     | 0.143 | 0     | 0  | 0     | 0  | 0     | nd    | nd    |
| M6     | 14          | 0        | 0 | 0     | 0.03  | 0.133 | 0.062 | 0.03  | 0  | 0     | nd | nd    | nd    | nd    |
| M6     | 16          | 0        | 0 | 0     | 0.125 | 0.125 | 0.125 | 0     | nd | nd    | nd | nd    | nd    | nd    |
| M6     | 18          | 0        | 0 | 0.027 | 0.147 | 0.147 | 0.118 | nd    | nd | nd    | nd | nd    | nd    | nd    |
| M6     | 20          | 0        | 0 | 0     | 0.111 | 0.081 | 0.026 | nd    | nd | nd    | nd | nd    | nd    | nd    |
| M7     | 2           | 0        | 0 | 0     | 0     | 0     | 0     | 0     | 0  | 0     | 0  | 0     | 0     | 0     |
| M7     | 4           | 0        | 0 | 0     | 0     | 0     | 0     | 0     | 0  | 0     | 0  | 0.023 | 0.023 | 0.023 |
| M7     | 6           | 0        | 0 | 0     | 0     | 0     | 0     | 0     | 0  | 0.045 | 0  | 0     | 0     | 0     |
| M7     | 8           | 0        | 0 | 0     | 0     | 0     | 0     | 0     | 0  | 0.091 | 0  | 0     | 0     | 0     |
| M7     | 10          | 0        | 0 | 0     | 0     | 0     | 0.087 | 0.136 | 0  | 0     | 0  | 0     | 0     | 0     |
| M7     | 12          | 0        | 0 | 0     | 0     | 0     | 0.13  | 0     | 0  | 0     | 0  | 0     | nd    | nd    |
| M7     | 14          | 0        | 0 | 0     | 0.149 | 0.125 | 0.102 | 0.08  | 0  | 0     | nd | nd    | nd    | nd    |
| M7     | 16          | 0        | 0 | 0     | 0.077 | 0.12  | 0.098 | 0     | nd | nd    | nd | nd    | nd    | nd    |
| M7     | 18          | 0        | 0 | 0.055 | 0.137 | 0.115 | 0.094 | nd    | nd | nd    | nd | nd    | nd    | nd    |
| M7     | 20          | 0        | 0 | 0.333 | 0.132 | 0.154 | 0.071 | nd    | nd | nd    | nd | nd    | nd    | nd    |

**Table 16.** Results of Bimax (best performance with highest JI across parameters tested in Table 15. Accur. Sens and Spec are accuracy, sensitivity and specificity respectively. Parameters are the minr and minc listed in Table 15. 200 clusters were identified in each run and the cluster which had the highest JI to each module is listed.

| Module | Best Cluster |         | JI   | Cluster Size |      | phenotype (Col) |      |      |      |      | Gene Set (Row) |      |      |      |      |
|--------|--------------|---------|------|--------------|------|-----------------|------|------|------|------|----------------|------|------|------|------|
|        | Parameters   | Cluster |      | nRow         | nCol | Accur           | Sens | Spec | PPV  | NPV  | Accur          | Sens | Spec | PPV  | NPV  |
| M1     | C16, R12     | 55      | 0.68 | 12           | 17   | 0.98            | 0.68 | 1.00 | 1.00 | 0.98 | 0.41           | 0.05 | 1.00 | 1.00 | 0.39 |
| M2     | C20, R8      | 154     | 0.14 | 8            | 25   | 0.62            | 0.14 | 1.00 | 1.00 | 0.60 | 0.83           | 0.11 | 1.00 | 1.00 | 0.83 |
| M3     | C20, R2      | 63      | 0.56 | 3            | 28   | 0.94            | 0.56 | 1.00 | 1.00 | 0.94 | 0.88           | 0.06 | 1.00 | 1.00 | 0.88 |
| M4     | C18, R6      | 43      | 0.28 | 6            | 19   | 0.92            | 0.33 | 0.98 | 0.68 | 0.93 | 0.89           | 0.03 | 0.99 | 0.17 | 0.90 |
| M5     | C14, R10     | 78      | 0.19 | 10           | 14   | 0.93            | 0.23 | 0.98 | 0.50 | 0.94 | 0.90           | 0.00 | 0.97 | 0.00 | 0.92 |
| M6     | C8, R18      | 146     | 0.17 | 19           | 8    | 0.95            | 0.20 | 0.99 | 0.50 | 0.96 | 0.94           | 0.40 | 0.97 | 0.42 | 0.97 |
| M7     | C20, R6      | 1       | 0.33 | 6            | 20   | 0.93            | 0.38 | 0.99 | 0.75 | 0.93 | 0.89           | 0.03 | 0.99 | 0.17 | 0.90 |



**Table 17.** Results of Bimax with parameters R22 and C4, which had highest JI sum over the 7 modules. JI between columns and rows are provided. Accur. Sens and Spec are accuracy, sensitivity and specificity respectively. 200 clusters were identified in each run and the cluster which had the highest JI to each module is listed.

| Module | Best Cluster | JI    |       | Cluster Size |      | phenotype (Col) |      |      |      |      | Gene Set (Row) |      |      |      |      |
|--------|--------------|-------|-------|--------------|------|-----------------|------|------|------|------|----------------|------|------|------|------|
|        |              | (col) | (row) | nRow         | nCol | Accur           | Sens | Spec | PPV  | NPV  | Accur          | Sens | Spec | PPV  | NPV  |
| M1     | 168          | 0.24  | 0.30  | 41           | 6    | 0.95            | 0.24 | 1.00 | 1.00 | 0.95 | 0.48           | 0.16 | 1.00 | 1.00 | 0.42 |
| M2     | 101          | 0.02  | 0.30  | 22           | 4    | 0.57            | 0.02 | 1.00 | 1.00 | 0.57 | 0.86           | 0.28 | 1.00 | 0.95 | 0.86 |
| M3     | 1            | 0.08  | 0.50  | 24           | 4    | 0.88            | 0.08 | 1.00 | 1.00 | 0.88 | 0.94           | 0.48 | 1.00 | 1.00 | 0.93 |
| M4     | 33           | 0.10  | 0.37  | 26           | 4    | 0.91            | 0.10 | 1.00 | 1.00 | 0.91 | 0.88           | 0.25 | 0.96 | 0.38 | 0.92 |
| M5     | 110          | 0.10  | 0.40  | 23           | 4    | 0.93            | 0.10 | 1.00 | 0.75 | 0.93 | 0.92           | 0.37 | 0.97 | 0.48 | 0.95 |
| M6     | 109          | 0.04  | 0.14  | 22           | 4    | 0.94            | 0.05 | 0.99 | 0.25 | 0.95 | 0.90           | 0.00 | 0.94 | 0.00 | 0.95 |
| M7     | 101          | 0.02  | 0.17  | 22           | 4    | 0.90            | 0.02 | 0.99 | 0.25 | 0.90 | 0.84           | 0.00 | 0.94 | 0.00 | 0.89 |

---

## 5 ANALYSIS OF BREAST CANCER DATA:

### 5.1 Discovery of new modules - analysis of GSVA data

GSVA was performed using default parameters on each dataset and the distribution of results were explored to determine a threshold at which the data would be discretized. We selected a threshold of  $\pm 0.3$  as it would yield a matrix with approximately 10% of associations. A histogram should the statistics from each analysis is given below

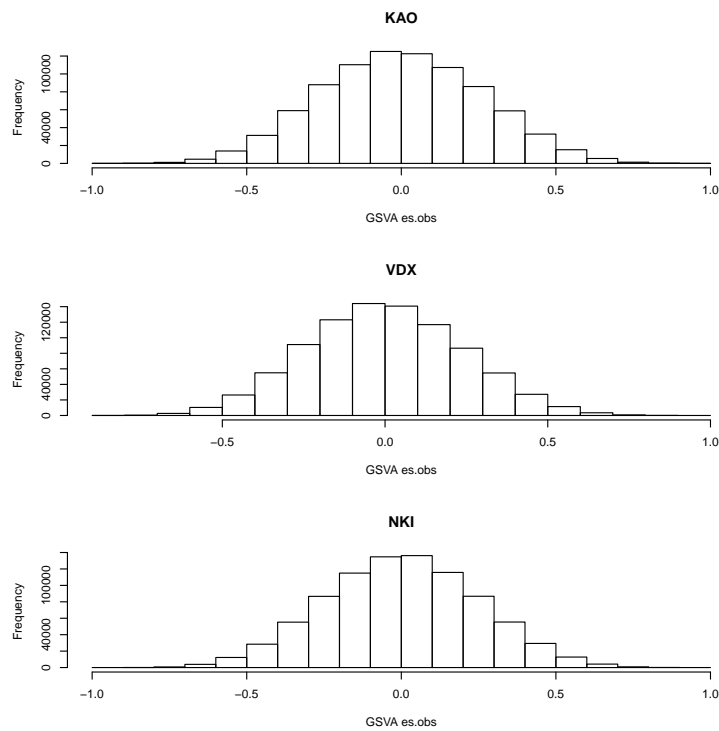

**Supplementary Fig. 10.** Distributions of results of GSVA analysis of each of the three breast cancer datasets (KAO, VDX, NKI)

Results in the Table 18 summarize the 13 modules in results of GSVA analysis of 3 breast cancer datasets (KAO, NKI and VDX). Overall Survival (O.Surv.) and Distant Metastasis Free survival analysis was performed using a cox regression model (coxph in R) and pvalue were FDR corrected for multiple testing. Cells highlights in red indicate modules significantly associated with poor prognosis whereas those in green are associated with a favorable outcome. Cells highlighted in yellow and blue respresented modules that were over or under represented in a breast cancer molecular subtypes respectively, the analysis of which was performed using a Fisher exact test and resulting p-value were corrected for multiple testing using a FDR correction.

**Table 18.** Modules (n=13) discovered by iBBiG in analysis of results of GSVA of gene expression profiles from three breast cancer study. Colors highlight modules significantly enriched in breast cancer molecular subtype by Fisher exact test (greater, yellow; less, blue) or prognostic of good (green) or poor (red) overall (OS) or distant metastases free survival (DMFS) either within a molecular subtypes or across all cancers

|     | Gene Sets |                                                      | Phenotypes |                                       | KAO/VDX/NKI | Molecular Subtype |       |       |       | Prognostic in Molecular Subtypes |          |      |       | All Subtypes |       |
|-----|-----------|------------------------------------------------------|------------|---------------------------------------|-------------|-------------------|-------|-------|-------|----------------------------------|----------|------|-------|--------------|-------|
|     | N         | Description                                          | N          | Description                           |             | LumA              | LumB  | Her2  | Basal | Lum A                            | Lum B    | Her2 | Basal | OS           | DMFS  |
| M1  | 206       | Cell Cycle check-point genes, ESR1                   | 215        | Luminal A, Good prognosis             | 78/62/75    | 0.000             | 0.000 | 0.000 | 0.000 | dmfs                             |          |      |       | 0.000        | 0.000 |
| M2  | 265       | Proliferation up, ES up (Ben porath signatures), IFN | 163        | Basal-Like, Poor prognosis            | 59/54/50    | 0.000             | 0.000 | NS    | 0.000 |                                  | OS, dmfs |      |       | 0.001        | 0.050 |
| M3  | 263       | ESR1 genes, Immune                                   | 127        | Luminal A or B                        | 58/36/33    | 0.002             | 0.003 | 0.011 | 0.000 |                                  |          |      | dmfs  | NS           | NS    |
| M4  | 209       | Inflammatory response                                | 161        | Basal-like or HER2                    | 73/47/41    | 0.000             | 0.000 | 0.000 | 0.000 |                                  |          |      |       | NS           | NS    |
| M5  | 348       | Stromal                                              | 63         | Overlap M1, M4                        | 33/11/19    | NS                | 0.001 | NS    | NS    |                                  |          |      |       | NS           | NS    |
| M6  | 294       | Stromal                                              | 27         | Luminal B (subset of M2, M3)          | 14/1/12     | NS                | 0.029 | NS    | NS    |                                  |          |      |       | NS           | NS    |
| M7  | 412       | Immune response (maybe B-cells)                      | 23         | Overlap with M4                       | 18/2/3      | NS                | NS    | NS    | NS    |                                  |          |      |       | NS           | NS    |
| M8  | 104       | Immune response (IFN)                                | 115        | Luminal A (some B) No overlap with M1 | 37/30/48    | 0.000             | NS    | 0.004 | 0.000 |                                  | dmfs     |      |       | NS           | NS    |
| M9  | 447       | proliferation up                                     | 7          | Overlaps with M3                      | 3/3/1       | NS                | NS    | NS    | NS    |                                  |          |      |       | NS           | NS    |
| M10 | 177       | <b>Metastatic</b>                                    | 35         | Poor prognosis, no overlaps           | 13/9/13     | NS                | NS    | NS    | NS    | dmfs                             |          | dmfs |       | NS           | 0.002 |
| M11 | 383       | Stromal                                              | 17         | Poor prognosis, overlaps M4           | 13/2/2      | NS                | NS    | NS    | NS    |                                  |          | dmfs |       | NS           | 0.080 |
| M12 | 529       | AKT, HIF                                             | 5          | Overlap M2                            | 3/2/0       | NS                | NS    | NS    | NS    |                                  |          |      |       | NS           | NS    |
| M13 | 271       | metabolism                                           | 19         | Luminal A, overlaps M1                | 9/1/9       | 0.000             | NS    | NS    | 0.044 |                                  |          |      |       | NS           | NS    |

## 5.2 Discovery of new modules - M1

The first module identified contained 215 phenotypes which were enriched in estrogen receptor positive low grade luminal A breast cancer. Expression of these gene sets (n=206) was associated with a better outcome in breast cancer patients

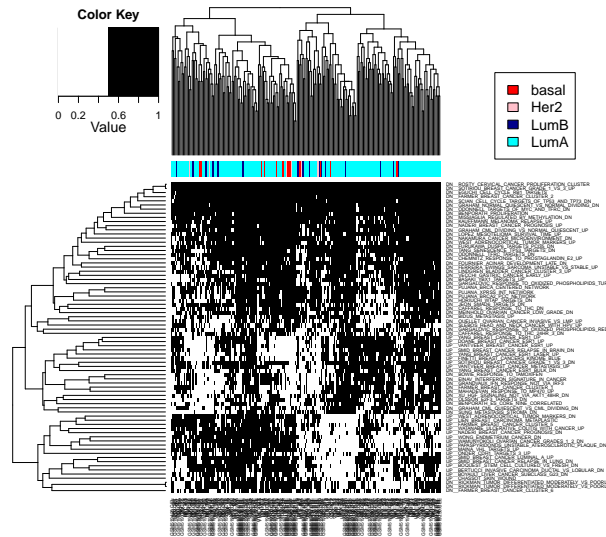

**Supplementary Fig. 11.** Heatmap showing geneset and phenotypes which characterize module M11

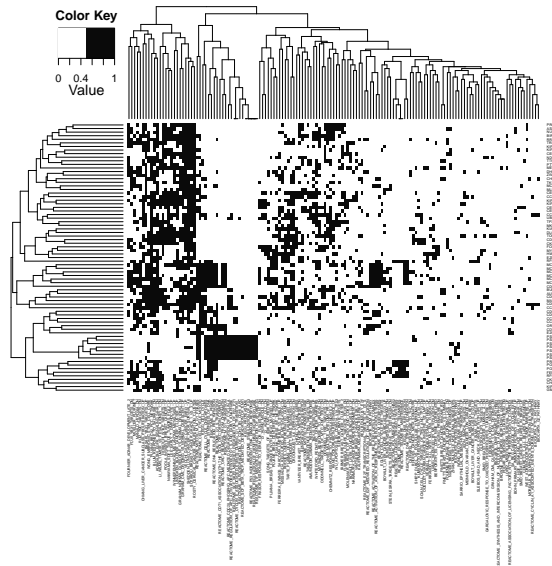

**Supplementary Fig. 12.** Heatmap showing genes which were significantly differentially regulated (limma lmfut/eBayes  $p_i < 0.001$ ) and are members of gene sets in M1

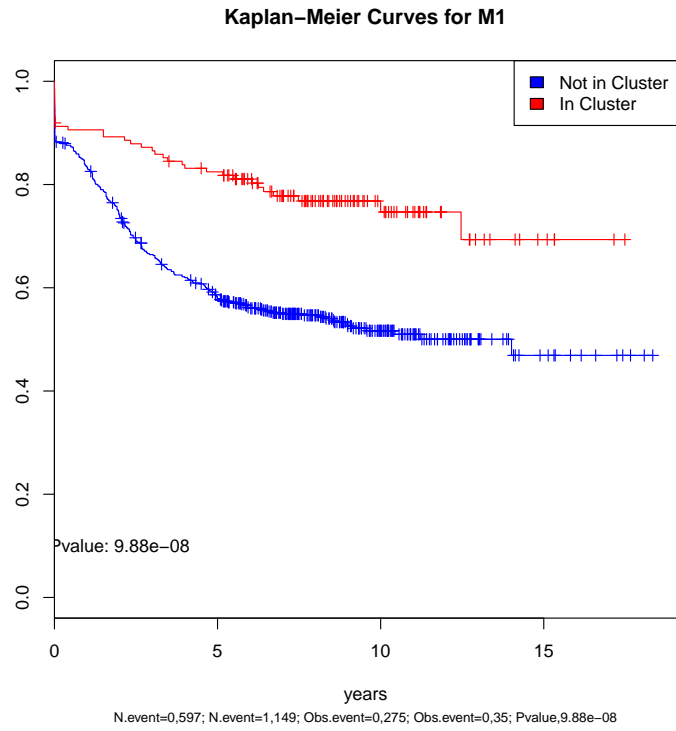

**Supplementary Fig. 13.** KM curve showing the ability of M1 to distinguish breast cancer patients with better distant metastases free survival

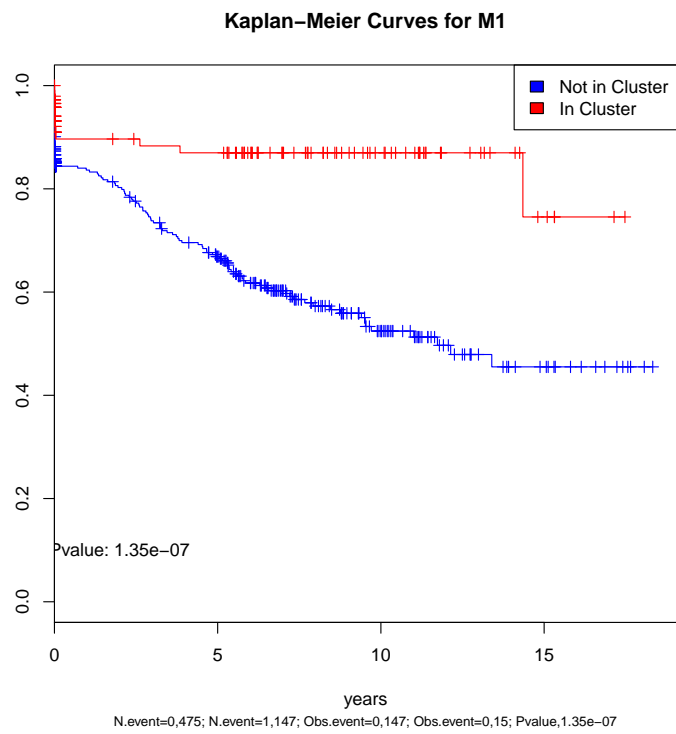

**Supplementary Fig. 14.** KM curve showing the ability of M1 to distinguish breast cancer patients with better overall survival

### 5.3 Discovery of new modules - M2

The second module identified contained 163 phenotypes which were enriched in estrogen receptor negative high grade basal-like breast cancer. Expression of these gene sets (n=265) was associated with a poorer outcome in breast cancer patients

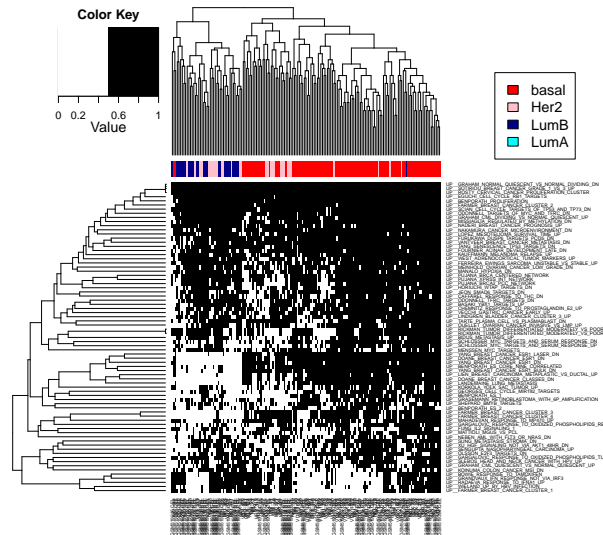

Supplementary Fig. 15. Heatmap showing geneset and phenotypes which characterize module M2

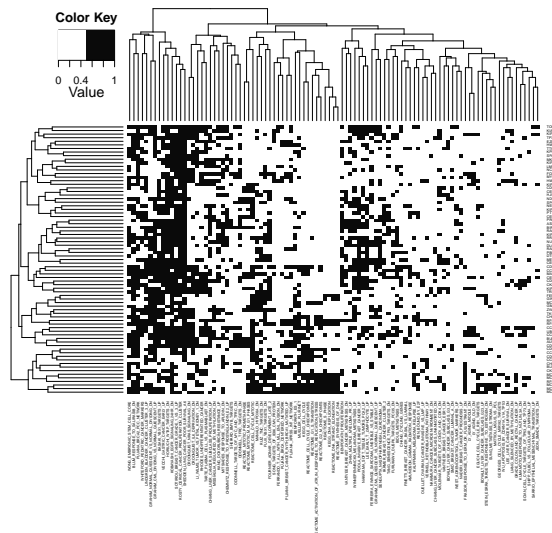

Supplementary Fig. 16. Heatmap showing genes which were significantly differentially regulated (limma lmfut/eBayes  $p_1 < 0.001$ ) and are members of gene sets in M2

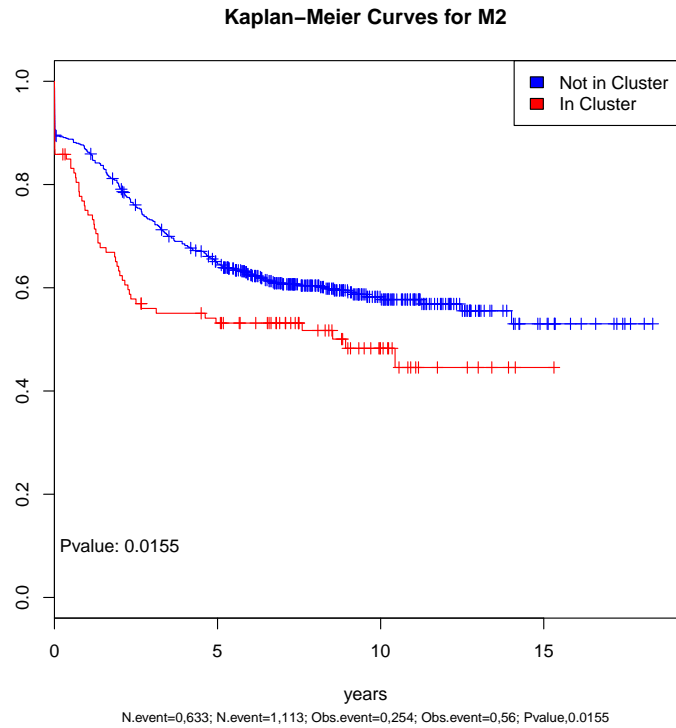

**Supplementary Fig. 17.** KM curve showing the ability of M2 to distinguish breast cancer patients with better distant metastases free survival

#### **5.4 Discovery of new modules - M10**

The second module identified contained 163 phenotypes which were enriched in estrogen receptor negative high grade basal-like breast cancer. Expression of these gene sets (n=265) was associated with a poorer outcome in breast cancer patients

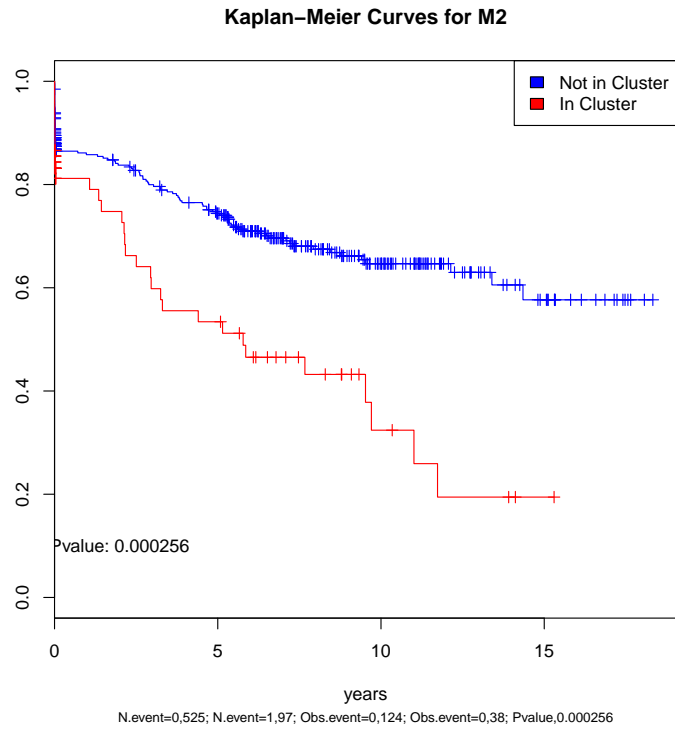

**Supplementary Fig. 18.** KM curve showing the ability of M2 to distinguish breast cancer patients with better overall survival

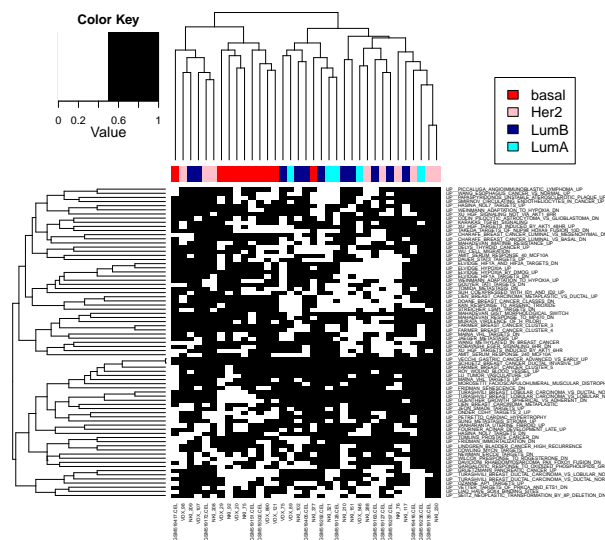

**Supplementary Fig. 19.** Heatmap showing geneset and phenotypes which characterize module 10



**Kaplan–Meier Curves for M10**

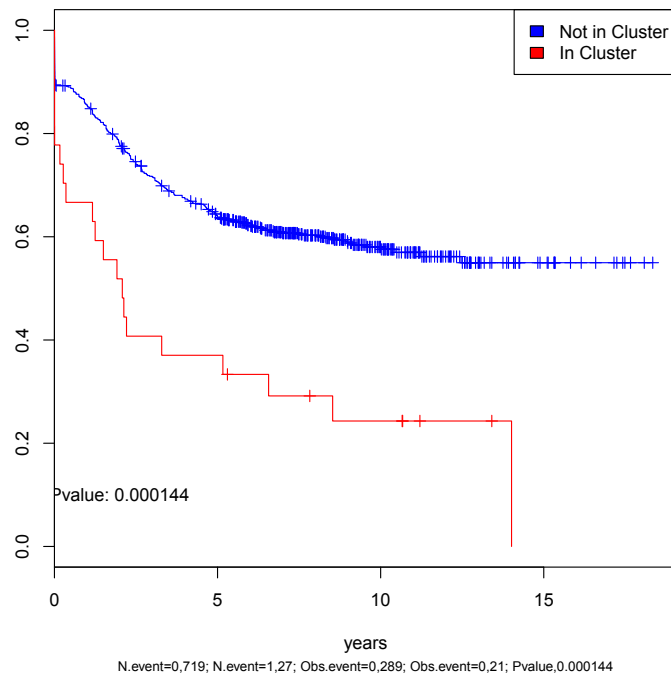

**Supplementary Fig. 20.** KM curve showing the ability of M10 to distinguish breast cancer patients with and without distant metastases free survival

**Table 19.** There were 177 gene sets in M10 and the 20 gene sets with highest scores are provided. Each of these were upregulated in M10

| Gene Sets                                                | Score     |
|----------------------------------------------------------|-----------|
| REN_ALVEOLAR_RHABDOMYOSARCOMA_DN                         | 28.732498 |
| CROMER_TUMORIGENESIS_UP                                  | 27.914161 |
| VECCHI_GASTRIC_CANCER_ADVANCED_VS_EARLY_UP               | 27.63875  |
| ROZANOV_MMP14_TARGETS_SUBSET                             | 23.679678 |
| SCHUETZ_BREAST_CANCER_DUCTAL_INVASIVE_UP                 | 23.653064 |
| FARMER_BREAST_CANCER_CLUSTER_5                           | 23.512512 |
| MAHADEVAN_GIST_MORPHOLOGICAL_SWITCH                      | 21.209128 |
| TURASHVILI_BREAST_LOBULAR_CARCINOMA_VS_DUCTAL_NORMAL_UP  | 21.208569 |
| ROY_WOUND_BLOOD_VESSEL_UP                                | 21.070373 |
| TURASHVILI_BREAST_LOBULAR_CARCINOMA_VS_LOBULAR_NORMAL_DN | 20.669667 |
| LU_TUMOR_VASCULATURE_UP                                  | 20.329544 |
| MISHRA_CARCINOMA_ASSOCIATED_FIBROBLAST_UP                | 20.138516 |
| HASINA_NOL7_TARGETS_UP                                   | 19.081524 |
| LU_TUMOR_ANGIOGENESIS_UP                                 | 19.072392 |
| BRUECKNER_TARGETS_OF_MIRLET7A3_DN                        | 18.460937 |
| ALONSO_METASTASIS_NEURAL_UP                              | 18.276682 |
| MAINA_VHL_TARGETS_UP                                     | 17.989316 |
| VERRECCHIA_RESPONSE_TO_TGFB1_C1                          | 17.982409 |
| CROONQUIST_STROMAL_STIMULATION_UP                        | 17.914741 |

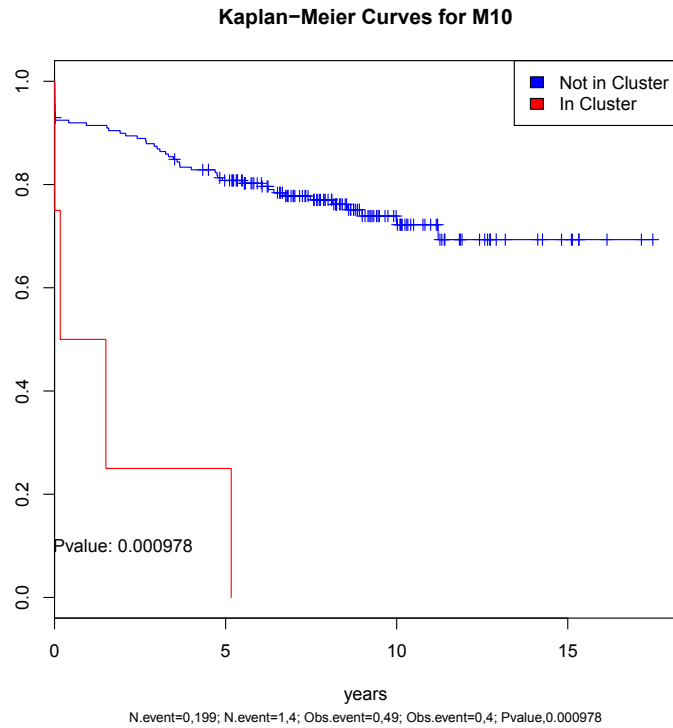

**Supplementary Fig. 21.** KM curve showing the ability of M10 to distinguish Luminal A molecular subtype breast cancer patients with and without distant metastases free survival

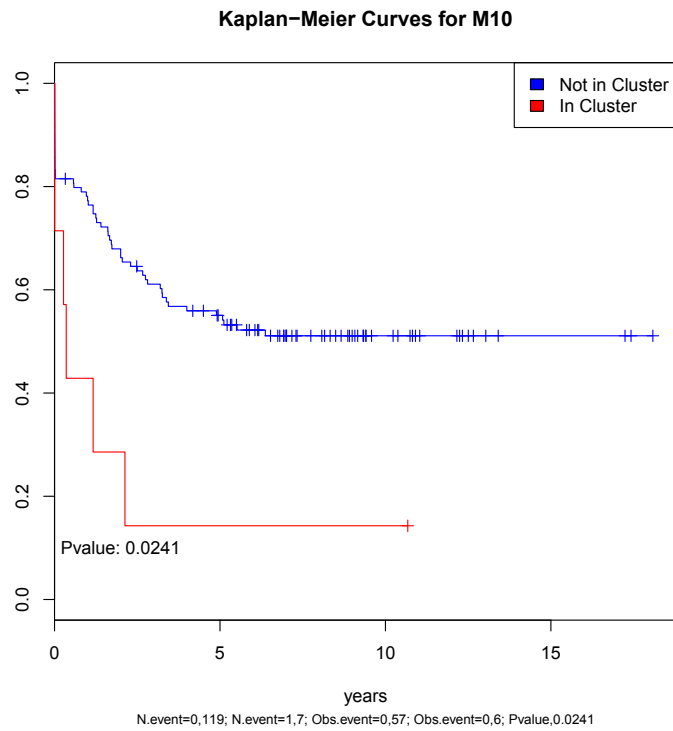

**Supplementary Fig. 22.** KM curve showing the ability of M10 to distinguish ERBB2 molecular subtype breast cancer patients with and without distant metastases free survival

## 5.5 Discovery of modules associated with known clinical covariates in breast cancer

Results of bi-cluster analysis with iBBiG on the breast cancer dataset with 50 modules

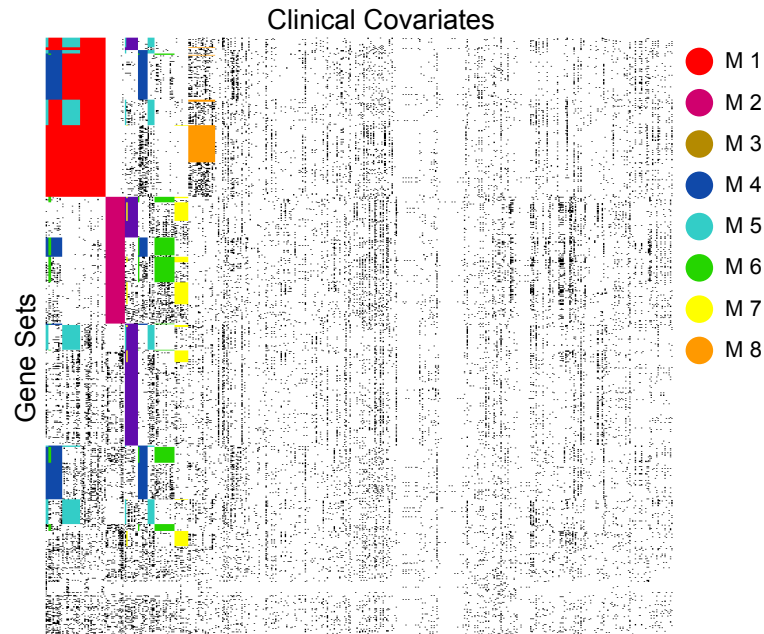

**Supplementary Fig. 23.** Meta-GSA using iBBiG bi-clustering associations between 2853 gene sets and 448 clinical covariates resulting from the gene set enrichment analysis of 22 breast cancer datasets. The first eight modules (M1-M8) are shown. The covariates and the gene sets are ordered according to module membership (Detailed description in Supplement). The fitness score and size of modules are provided in Supplement Figure S5 and a more detailed view of the gene sets and covariates that make up module (M4) are provided in supplementary Figure S6.

**Table 20.** Summary of the eight resulting breast cancer modules B1-B8 resulting from iBBiG cluster discovery in results of GSEAIm gene set enrichment analysis of genes that were differentially expressed between pairwise tests of 10446 clinical covariates

|    | Number Datasets | Module Size    |           | Pairwise Tests                                                                    | Gene Sets                                                                                                                                                                                                         |
|----|-----------------|----------------|-----------|-----------------------------------------------------------------------------------|-------------------------------------------------------------------------------------------------------------------------------------------------------------------------------------------------------------------|
|    |                 | Pairwise Tests | Gene Sets |                                                                                   |                                                                                                                                                                                                                   |
| B1 | 14              | 43             | 247       | High grade, basal / luminal B, mutant p53, ER-, PR-, immortal, relapse, cell line | DNA replication, cell cycle, mitosis, M-phase, spindle, DNA metabolic process and apoptotic mitochondrial changes                                                                                                 |
| B2 | 7               | 9              | 262       | High grade, untreated, resistant, immortal                                        | Wound healing, coagulation, response to light stimulus, cell-cell signaling, excretion, ion channel activity, transmembrane receptor activity and plasma membrane                                                 |
| B3 | 6               | 14             | 270       | Low grade, wild-type p53, normal like breast tissue                               | Developmental maturation, enzyme linked receptor protein signaling, cell maturation, basolateral plasma membrane, basal lamina, negative regulation of cell differentiation and extracellular matrix              |
| B4 | 11              | 21             | 75        | High grade, basal / luminal B, mutant p53, ER-, PR-, no metastasis                | Regulation of immune system process, IL17 pathway, protein kinase cascade, T-cell receptor signaling, lymphocyte activation and chemokine activation                                                              |
| B5 | 8               | 19             | 89        | Cell line, luminal, low stage, metastatic                                         | DNA directed RNA polymerase, endoplasmic reticulum, protein catabolic process, RNA splicing, ubiquitin protein ligase activity, cellular protein catabolic process, secondary metabolic process and citrate cycle |
| B6 | 9               | 17             | 74        | Tamoxifen treated, luminal, ER+, PR+                                              | Synaptic vesicle, secretion by cell, vesicle mediated transport, intrinsic to Golgi membrane, sphingoid metabolic process, Golgi vesicle transport and Golgi stack                                                |
| B7 | 4               | 11             | 115       | No relapse, no subtype, high grade                                                | Insulin like growth factor receptor binding, extracellular matrix, myoblast differentiation, actin binding, muscle cell differentiation, focal adhesion, muscle development and cell matrix junction              |
| B8 | 10              | 19             | 62        | High stage, ER-, metastatic, basal, ductal                                        | Cell cycle process, chromosome segregation, mitosis, cell cycle checkpoint, interphase and, condensed chromosome                                                                                                  |

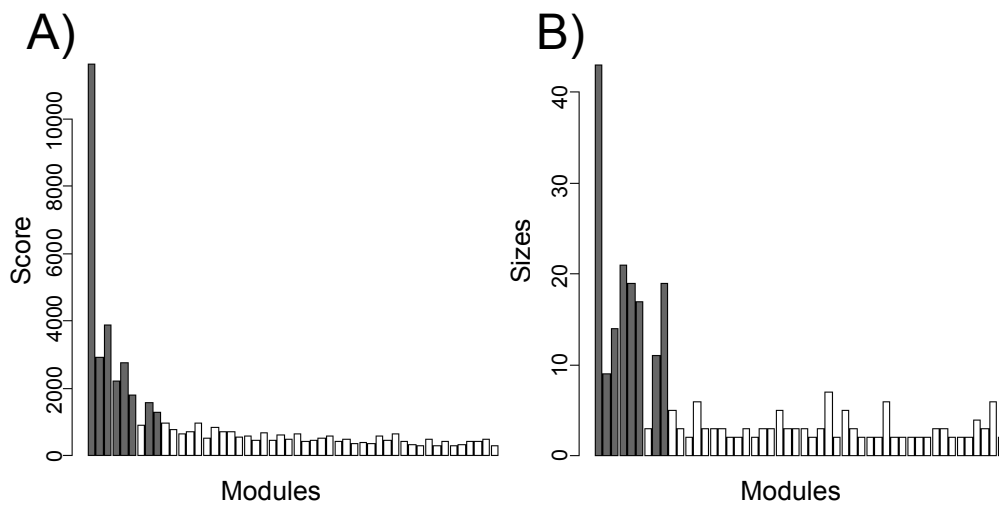

**Supplementary Fig. 24.** Results of bi-cluster analysis with iBBiG on the breast cancer dataset with 50 modules; A) histogram of the size. Selected modules are shown in gray; modules that we not used are shown in white. B) Fitness scores of the first 50 modules.

The B4 module also included seven gene signatures from published articles that were indexed by GeneSigDB (Culhane *et al.*, 2009) from studies of leukemia ( $n = 4$ ), stomach, colon and 95 gene signatures of STAT1 immune signaling in breast cancer (Supplemental Figure 26). 15 genes were represented in at least two of the seven gene signatures. These included key immune and T-cell regulatory gene CCL5, which was prognostic of better outcome in Basal-like and ERBB2+ breast cancer in a meta-analysis of six publicly available datasets (Supplemental Figure 26).

**Table 21.** Examples of the most common pairwise tests within our breast cancer datasets. The first column indicates the clinical covariate, the second the different classes that are contained in the covariate and the third the different pairwise tests that were applied.

| Clinical Covariate  | Class                                             | Pairwise-Test                                                                                                               |
|---------------------|---------------------------------------------------|-----------------------------------------------------------------------------------------------------------------------------|
| ER                  | {pos,neg}                                         | ER pos vs. ER neg                                                                                                           |
| PR                  | {pos,neg}                                         | PR pos vs. PR neg                                                                                                           |
| LN                  | {pos,neg}                                         | LN pos vs. LN neg                                                                                                           |
| HER2                | {pos,neg}                                         | HER2 pos vs HER2 neg                                                                                                        |
| p53                 | {pos,neg}                                         | p53 mutant vs. p53 wildtype                                                                                                 |
| Stage               | {1, 2, 3, 4}                                      | 1 vs.2, 1 vs. 3, 1 vs. 4, 2 vs. 3, 2 vs. 4, 3 vs. 4                                                                         |
| grade               | {1, 2, 3}                                         | 1 vs. 3, 2 vs. 3, 1 vs. 3                                                                                                   |
| relapse             | {yes,no}                                          | relapse vs. no relapse                                                                                                      |
| rfs                 | {yes,no}                                          | yes vs. no                                                                                                                  |
| dfms                | {yes,no}                                          | yes vs. no                                                                                                                  |
| tumor subtype       | {Normal like, Luminal A, Luminal B, ERBB2, Basal} | normal-lumA, normal-lumB, normal-ERBB2, normal-Basal, lumA-lumB, lumA-ERBB2, lumB-Basal,lumB-ERBB2, lumB-Basal, ERBB2-Basal |
| disease state       | {Tumor, Normal}                                   | Tumor vs. Normal                                                                                                            |
| metastasis          | {yes,no}                                          | metastasis vs. no metastasis                                                                                                |
| tamoxifen treatment | {yes,no}                                          | tamoxifen treatment vs. no treatment                                                                                        |
| cell type           | {lobular, ductal}                                 | lobular vs. ductal                                                                                                          |
| tissue type         | {tumor epithelium, stroma}                        | tumor epithelium vs. stroma                                                                                                 |

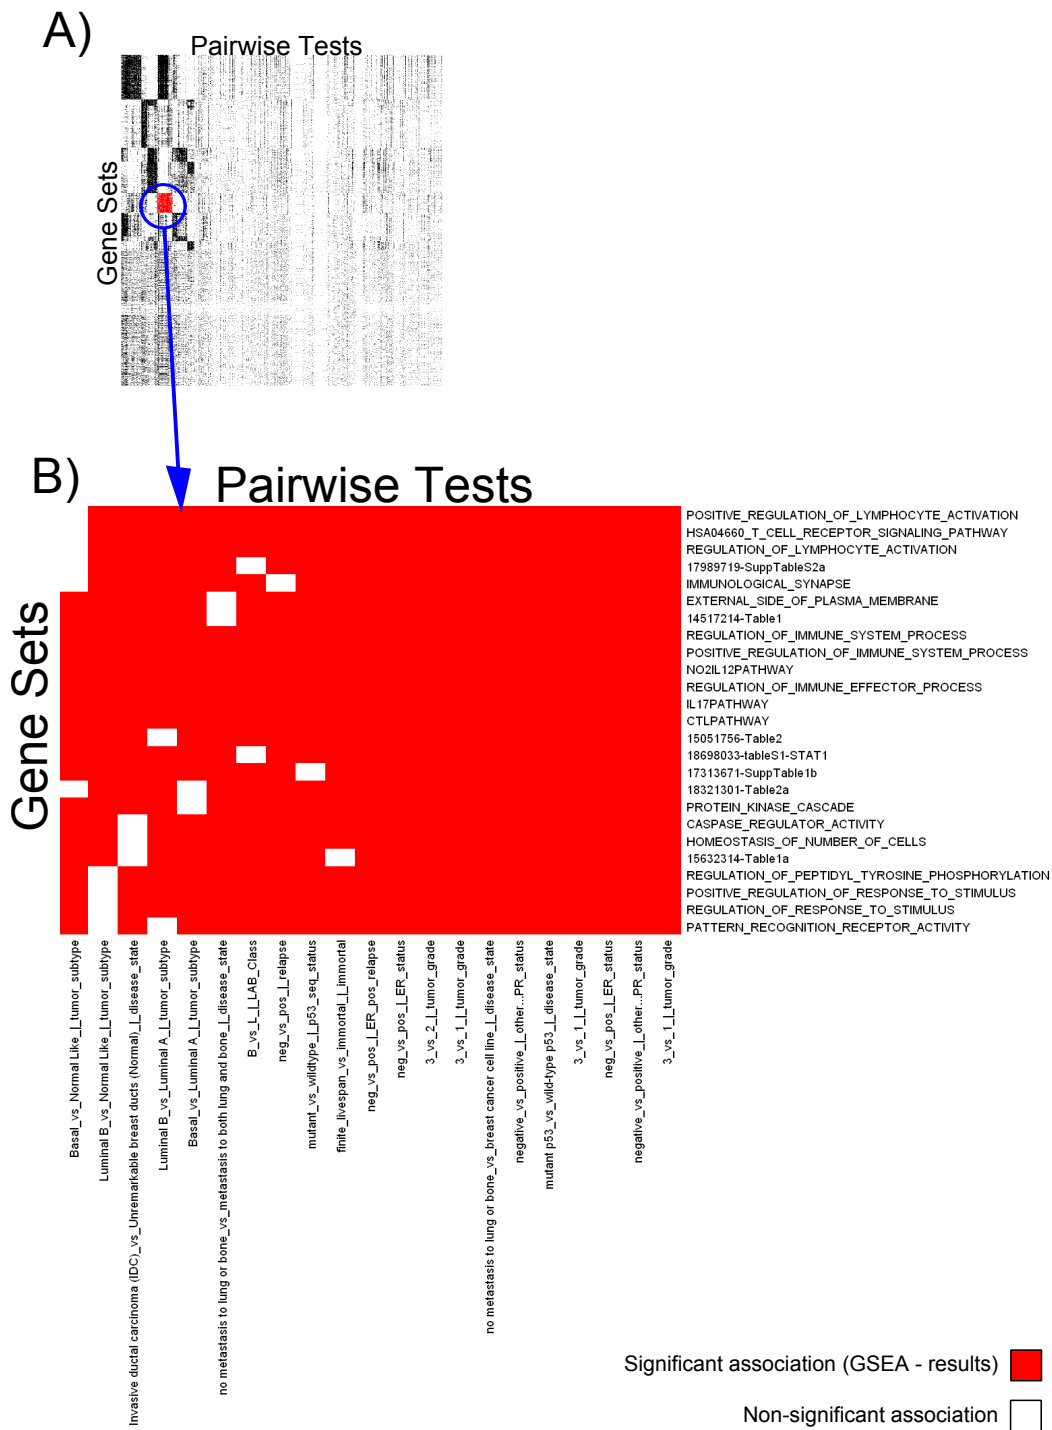

**Supplementary Fig. 25.** iBBiG clustering results on the breast cancer dataset. A) All associations between phenotypes and gene sets. Module 4 (B4) is highlighted in red. B) Detailed view of B4, showing all pair-wise tests in pairwise tests (n=21) and the top ranking gene sets (n=25). M4 shows the link between high grade, hormonal negative, basal-like breast cancer and an elevated immune response.

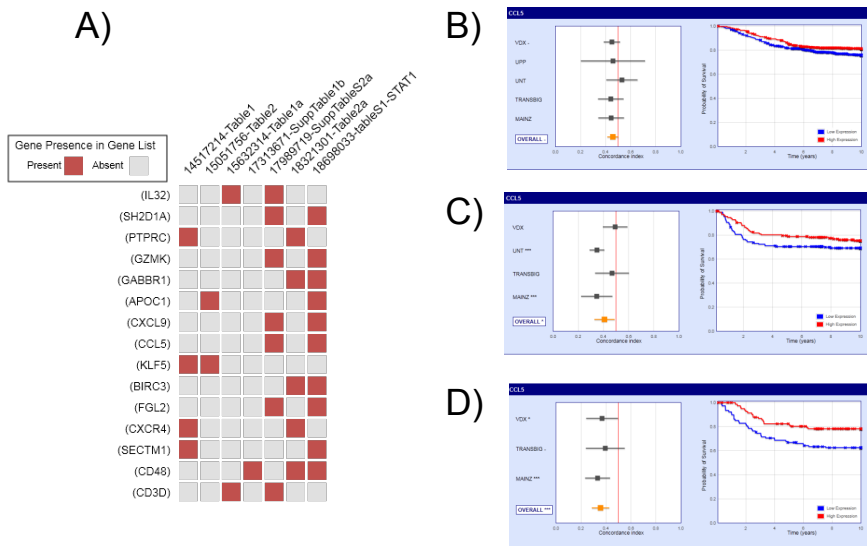

**Supplementary Fig. 26.** Genes that were present in at least two of the GeneSigDB gene signatures that were significant in Breast Cancer module B4 are shown in A) heatmap showing the presence (red) or absence (gray) of genes in B4 GeneSigDB gene signatures. Most of these genes were associated with good prognosis and we shown results of survival analysis of CCL5 in six breast cancer datasets in breast cancer molecular subtypes B) Luminal C) Basal-like and D) ERBB2+ which has an overall c-index of 0.458, 0.408 and 0.356 respectively.

## 5.6 Analysis of NHGRI GWAS catalog

Finally, iBBiG was applied to the extremely sparse NHGRI GWAS catalog to demonstrate that the method is capable of detecting small clusters in addition to larger clusters

iBBiG was applied to discretized data from the NHGRI genome wide association study (GWAS) catalog (accessed 3/7/2012), which contained data on 619 diseases (traits) and 7463 genes (Hindorff *et al.*, 2009) extracted from 1186 publications, in which only 0.3% of data had an association (i.e. one or more publications had reported a significant ( $p < 1.0 \times 10^{-5}$ ) single nucleotide polymorphism (SNP) association between the gene and the trait).

We ran iBBiG to detect an excess of clusters, but only a few clusters were detected in this data when we applied iBBiG to the matrix of genes x traits. This matrix is extremely sparse and few small clusters are expected. Note no modules was identified that had a positive weighted score, indicating that iBBiG had low confidence in these modules. Therefore we ran iBBiG 100 times, and present average analysis of these runs. Only gene and traits that occurred in at least of 65% of runs are presented.

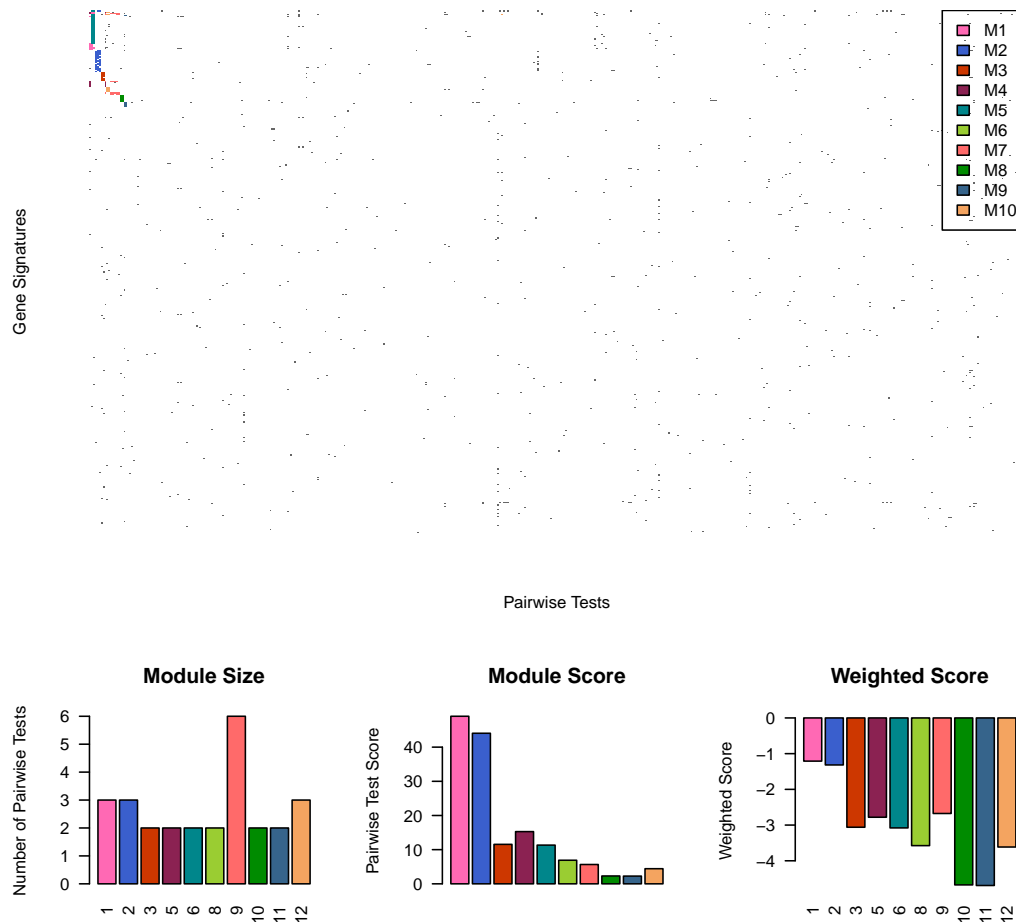

Supplementary Fig. 27. iBBiG results of analysis of the extremely sparse GWAS catalog data.

**Table 22.** Size (nrow, ncol), Genes identifiers (hgnc gene symbols) and Traits of Modules identified by iBBiG in the GWAS catalog data

Module 1

37 3

|             |             | Cholesterol, total | HDL cholesterol | LDL cholesterol |
|-------------|-------------|--------------------|-----------------|-----------------|
| 10452       | TOMM40      | 1                  | 1               | 1               |
| 124989      | C17orf57    | 1                  | 0               | 1               |
| 158219      | TTC39B      | 1                  | 1               | 0               |
| 19          | ABCA1       | 1                  | 1               | 0               |
| 1952        | CELSR2      | 1                  | 0               | 1               |
| 2444        | FRK         | 1                  | 0               | 1               |
| 255738      | PCSK9       | 1                  | 0               | 1               |
| 2646        | GCKR        | 1                  | 0               | 1               |
| 29116       | MYLIP       | 1                  | 0               | 1               |
| 29881       | NPC1L1      | 1                  | 0               | 1               |
| 3077        | HFE         | 1                  | 0               | 1               |
| 3122        | HLA-DRA     | 1                  | 0               | 1               |
| 3156        | HMGCR       | 1                  | 0               | 1               |
| 3172        | HNF4A       | 1                  | 1               | 0               |
| 3250        | HPR         | 1                  | 0               | 1               |
| 338         | APOB        | 1                  | 1               | 1               |
| 341         | APOC1       | 1                  | 1               | 1               |
| 3949        | LDLR        | 1                  | 0               | 1               |
| 3992        | FADS1       | 1                  | 1               | 1               |
| 5339        | PLEC        | 1                  | 0               | 1               |
| 55219       | TMEM57      | 1                  | 0               | 1               |
| 57678       | GPAM        | 1                  | 0               | 1               |
| 57794       | SUGP1       | 1                  | 0               | 1               |
| 64240;64241 | ABCG5;ABCG8 | 1                  | 0               | 1               |
| 64241       | ABCG8       | 1                  | 0               | 1               |
| 64757       | MOSC1       | 1                  | 0               | 1               |
| 6484        | ST3GAL4     | 1                  | 0               | 1               |
| 6580        | SLC22A1     | 1                  | 0               | 1               |
| 6927        | HNF1A       | 1                  | 0               | 1               |
| 7150        | TOP1        | 1                  | 0               | 1               |
| 7227        | TRPS1       | 1                  | 1               | 0               |
| 85440       | DOCK7       | 1                  | 0               | 1               |
| 8701        | DNAH11      | 1                  | 0               | 1               |
| 8882        | ZNF259      | 1                  | 1               | 1               |
| 91937       | TIMD4       | 1                  | 0               | 1               |
| 94039       | ZNF101      | 1                  | 0               | 1               |
| 9415        | FADS2       | 1                  | 1               | 1               |

Module 2

22 3

|        |           | Blood pressure | Diastolic blood pressure | Systolic blood pressure |
|--------|-----------|----------------|--------------------------|-------------------------|
| 10019  | SH2B3     | 0              | 1                        | 1                       |
| 143872 | ARHGAP42  | 1              | 1                        | 1                       |
| 144100 | PLEKHA7   | 1              | 1                        | 1                       |
| 1445   | CSK       | 1              | 1                        | 1                       |
| 2122   | MECOM     | 1              | 1                        | 1                       |
| 219621 | C10orf107 | 1              | 1                        | 0                       |
| 2242   | FES       | 1              | 1                        | 1                       |
| 22834  | ZNF652    | 1              | 1                        | 0                       |
| 22978  | NT5C2     | 1              | 0                        | 1                       |
| 2982   | GUCY1A3   | 1              | 1                        | 1                       |



---

|       |         |   |   |   |
|-------|---------|---|---|---|
| 3077  | HFE     | 0 | 1 | 1 |
| 4343  | MOV10   | 1 | 1 | 1 |
| 4524  | MTHFR   | 1 | 0 | 1 |
| 490   | ATP2B1  | 0 | 1 | 1 |
| 51196 | PLCE1   | 1 | 1 | 1 |
| 54897 | CASZ1   | 1 | 0 | 1 |
| 54986 | ULK4    | 1 | 1 | 0 |
| 6311  | ATXN2   | 1 | 1 | 0 |
| 64116 | SLC39A8 | 1 | 1 | 1 |
| 783   | CACNB2  | 1 | 1 | 1 |
| 7917  | BAT3    | 0 | 1 | 1 |
| 9570  | GOSR2   | 1 | 0 | 1 |

Module 3

8 2

|        |         | Crohn's disease | Ulcerative colitis |
|--------|---------|-----------------|--------------------|
| 149233 | IL23R   | 1               | 1                  |
| 150962 | PUS10   | 1               | 1                  |
| 159296 | NKX2-3  | 1               | 1                  |
| 4485   | MST1    | 1               | 1                  |
| 60468  | BACH2   | 1               | 0                  |
| 64170  | CARD9   | 1               | 1                  |
| 8927   | BSN     | 1               | 1                  |
| 9966   | TNFSF15 | 1               | 1                  |

Module 4

8 2

|                  |        | HDL cholesterol | Triglycerides |
|------------------|--------|-----------------|---------------|
| 1071             | CETP   | 1               | 1             |
| 144348;100533183 | ZNF664 | 1               | 1             |
| 2590             | GALNT2 | 1               | 1             |
| 26608            | TBL2   | 1               | 1             |
| 3992             | FADS1  | 1               | 1             |
| 4023             | LPL    | 1               | 1             |
| 63935            | PCIF1  | 1               | 1             |
| 8882             | ZNF259 | 1               | 1             |

Module 5

29 2

|        |          | Cholesterol, total | LDL cholesterol |
|--------|----------|--------------------|-----------------|
| 10452  | TOMM40   | 1                  | 1               |
| 124989 | C17orf57 | 1                  | 1               |
| 1952   | CELSR2   | 1                  | 1               |
| 2444   | FRK      | 1                  | 1               |
| 255738 | PCSK9    | 1                  | 1               |
| 2646   | GCKR     | 1                  | 1               |
| 29116  | MYLIP    | 1                  | 1               |
| 29881  | NPC1L1   | 1                  | 1               |
| 3077   | HFE      | 1                  | 1               |
| 3122   | HLA-DRA  | 1                  | 1               |
| 3156   | HMGCR    | 1                  | 1               |
| 3250   | HPR      | 1                  | 1               |
| 3949   | LDLR     | 1                  | 1               |
| 5339   | PLEC     | 1                  | 1               |
| 55219  | TMEM57   | 1                  | 1               |
| 57678  | GPAM     | 1                  | 1               |
| 57794  | SUGP1    | 1                  | 1               |

---

---

|             |             |   |   |
|-------------|-------------|---|---|
| 64240;64241 | ABCG5;ABCG8 | 1 | 1 |
| 64241       | ABCG8       | 1 | 1 |
| 64757       | MOSC1       | 1 | 1 |
| 6484        | ST3GAL4     | 1 | 1 |
| 6580        | SLC22A1     | 1 | 1 |
| 6927        | HNF1A       | 1 | 1 |
| 7150        | TOP1        | 1 | 1 |
| 85440       | DOCK7       | 1 | 1 |
| 8701        | DNAH11      | 1 | 1 |
| 91937       | TIMD4       | 1 | 1 |
| 94039       | ZNF101      | 1 | 1 |
| 9415        | FADS2       | 1 | 1 |

Module 6

7 2

|       |       | Metabolic traits | Serum metabolites |
|-------|-------|------------------|-------------------|
| 2646  | GCKR  | 1                | 1                 |
| 3818  | KLKB1 | 1                | 1                 |
| 3992  | FADS1 | 1                | 1                 |
| 5481  | PPID  | 1                | 1                 |
| 57818 | G6PC2 | 1                | 1                 |
| 5980  | REV3L | 1                | 1                 |
| 7840  | ALMS1 | 1                | 1                 |

Module 7

5 6

|             |              | HDL Cholesterol - Triglycerides (HDL-C-TG) | Metabolic syndrome                   | Metabolic syndrome (WC)                  |
|-------------|--------------|--------------------------------------------|--------------------------------------|------------------------------------------|
| 2646        | GCKR         | 0                                          | 0                                    | 0                                        |
| 4023        | LPL          | 1                                          | 1                                    | 1                                        |
| 84811       | BUD13        | 1                                          | 1                                    | 1                                        |
| 8882        | ZNF259       | 1                                          | 1                                    | 1                                        |
| 8882;116519 | ZNF259;APOA5 | 1                                          | 1                                    | 0                                        |
|             |              | Triglycerides                              | Triglycerides-Blood Pressure (TG-BP) | Waist Circumference - Triglycerides (WC) |
| 2646        |              | 1                                          | 1                                    | 1                                        |
| 4023        |              | 1                                          | 1                                    | 0                                        |
| 84811       |              | 1                                          | 1                                    | 1                                        |
| 8882        |              | 1                                          | 1                                    | 1                                        |
| 8882;116519 |              | 0                                          | 1                                    | 1                                        |

Module 8

7 2

|           |              | Body mass index | Weight |
|-----------|--------------|-----------------|--------|
| 100289003 | LOC100289003 | 1               | 1      |
| 25970     | SH2B1        | 1               | 1      |
| 4026      | LPP          | 1               | 1      |
| 497258    | BDNFOS       | 1               | 1      |
| 627       | BDNF         | 1               | 1      |
| 79068     | FTO          | 1               | 1      |
| 89866     | SEC16B       | 1               | 1      |

Module 9

6 2

|           |          | Coronary heart disease | Myocardial infarction (early onset) |
|-----------|----------|------------------------|-------------------------------------|
| 100048912 | CDKN2BAS | 1                      | 1                                   |
| 1952      | CELSR2   | 1                      | 1                                   |
| 221692    | PHACTR1  | 1                      | 1                                   |
| 375056    | MIA3     | 1                      | 1                                   |
| 55759     | WDR12    | 1                      | 1                                   |

---

---

6597 SMARCA4 1 1

Module 10

10 3

|       |         | Hematological and biochemical traits | Metabolic traits | Serum metabolites |
|-------|---------|--------------------------------------|------------------|-------------------|
| 2646  | GCKR    | 1                                    | 1                | 1                 |
| 28    | ABO     | 1                                    | 0                |                   |
| 3818  | KLKB1   | 0                                    | 1                | 1                 |
| 3992  | FADS1   | 0                                    | 1                | 1                 |
| 5481  | PPID    | 0                                    | 1                | 1                 |
| 57818 | G6PC2   | 0                                    | 1                | 1                 |
| 5980  | REV3L   | 0                                    | 1                | 1                 |
| 6205  | RPS11   | 1                                    | 0                | 1                 |
| 7840  | ALMS1   | 0                                    | 1                | 1                 |
| 8170  | SLC14A2 | 1                                    | 0                | 1                 |

## REFERENCES

Culhane, A. C. *et al.* (2009). GeneSigDBa curated database of gene expression signatures. *Nucleic Acids Research*, **38**(Database), D716D725.

Hindorf, L. A. *et al.* (2009). Potential etiologic and functional implications of genome-wide association loci for human diseases and traits. *Proceedings of the National Academy of Sciences of the United States of America*, **106**(23), 9362–9367. PMID: 19474294.
